# Supplementary material for: Transcriptomics Identify Thrombospondin‐2 as a Biomarker for NASH and Advanced Liver Fibrosis
Source: PubMed Central journal article supplement — Hepatology. 2021 Aug 21;74(5):2452–66. doi: 10.1002/hep.31995 (PMC8596693; doi:10.1002/hep.31995), 2021-08-21
Supplement: HEP-74-2452-s001.pdf [file HEP-74-2452-s001.pdf]

Supporting Table S1. Clinical and Serological Characteristics of 98 Biopsy-Proven NAFLD Patients Used for RNA Sequencing Analysis

| Variables                              | NAFL         | NASH         | <i>P</i> Value |
|----------------------------------------|--------------|--------------|----------------|
| Number                                 | 51           | 47           |                |
| Matteoni classification (1/2/3/4)      | 33/18/0/0    | 0/0/11/36    |                |
| Age (y)                                | 50.1 ± 11.6  | 58.3 ± 13.8  | <0.05          |
| Sex (M/F)                              | 43/8         | 21/26        | <0.05          |
| BMI (kg/m <sup>2</sup> )               | 26.6 ± 4.04  | 27.6 ± 4.37  | N.S.           |
| AST (U/L)                              | 37.1 ± 13.7  | 49.3 ± 24.1  | <0.05          |
| ALT (U/L)                              | 66.6 ± 33.1  | 79.7 ± 57.3  | N.S.           |
| GGT (U/L)                              | 88.9 ± 67.1  | 69.8 ± 48.2  | N.S.           |
| ALP (U/L)                              | 255.8 ± 77.9 | 260.9 ± 64.7 | N.S.           |
| Triglyceride (mg/dL)                   | 161.5 ± 95.7 | 166.0 ± 91.1 | N.S.           |
| LDL-C (mg/dL)                          | 128.2 ± 28.3 | 121.2 ± 33.6 | N.S.           |
| Fasting blood sugar (mg/dL)            | 103.6 ± 16.1 | 110.3 ± 35.5 | N.S.           |
| HbA1c (%)                              | 5.84 ± 0.62  | 6.05 ± 1.18  | <0.05          |
| AFP (ng/mL)                            | 3.34 ± 1.66  | 3.91 ± 1.99  | N.S.           |
| Albumin (g/dL)                         | 4.63 ± 0.27  | 4.51 ± 0.36  | N.S.           |
| Platelet count (X 10 <sup>4</sup> /μL) | 24.6 ± 6.16  | 20.8 ± 6.32  | <0.05          |
| FIB-4 index                            | 1.07 ± 0.80  | 1.88 ± 1.21  | <0.05          |

Abbreviations: AFP, alpha-fetoprotein; ALP, alkaline phosphatase; ALT, alanine aminotransferase; AST, aspartate aminotransferase; BMI, body mass index; F, female; GGT, γ-glutamyltranspeptidase; LDL-C, low-density lipoprotein cholesterol; M, male; N.S., not significant.

Supporting Table S2. 137 Significantly Upregulated Genes in NASH Compared to NAFL Among 98 Biopsy-Proven NAFLD Patients (More Than 2.5-Fold)

| Symbol    | Row Names         | Fold Change | Adjusted P Value | Gene Name                                                                      | PANTHER Protein Class                             | NAFL vs NASH F3 in European NAFLD Patients (Govareo O et al., Sci Transl Med 2020) |                  |
|-----------|-------------------|-------------|------------------|--------------------------------------------------------------------------------|---------------------------------------------------|------------------------------------------------------------------------------------|------------------|
|           |                   |             |                  |                                                                                |                                                   | Fold change                                                                        | adjusted p value |
| UBD       | ENSG00000213886   | 3.50        | 2.5E-19          | Ubiquitin D                                                                    |                                                   | 3.20                                                                               | 3.0E-05          |
| THBS2     | ENSG00000186340   | 2.72        | 8.4E-19          | Thrombospondin-2                                                               |                                                   | 2.55                                                                               | 6.6E-10          |
| LOXL4     | ENSG00000138131   | 2.76        | 4.5E-17          | Lysyl oxidase homolog 4                                                        | Oxidase (PC00175)                                 | 3.27                                                                               | 3.9E-09          |
| DTNA      | ENSG00000134769   | 5.02        | 9.9E-17          | Dystrobrevin alpha                                                             | Ubiquitin-protein ligase (PC00234)                | 4.62                                                                               | 2.4E-11          |
| LAMC3     | ENSG00000050555   | 2.76        | 3.3E-15          | Lamin subunit gamma-3                                                          | Extracellular matrix protein (PC00102)            | 2.77                                                                               | 1.2E-07          |
| TNFRSF12A | ENSG00000006327   | 2.53        | 1.8E-14          | Tumor necrosis factor receptor superfamily member 12A                          | Transmembrane signal receptor (PC00197)           | 2.67                                                                               | 1.5E-08          |
| COL10A1   | ENSG00000123500   | 4.98        | 9.8E-14          | Collagen alpha-1(X) chain                                                      | Extracellular matrix structural protein (PC00103) | 5.19                                                                               | 8.9E-09          |
| KLHL29    | ENSG00000119771   | 2.89        | 1.1E-13          | Kelch-like protein 29                                                          | Scaffold/adaptor protein (PC00226)                | 1.77                                                                               | 3.2E-03          |
| GPC3      | ENSG00000147257   | 5.95        | 2.9E-13          | Glypican-3                                                                     |                                                   | 3.86                                                                               | 1.5E-04          |
| SPATA21   | ENSG00000187144   | 5.95        | 3.7E-13          | Spermatogenesis-associated protein 21                                          | Calmodulin-related (PC00061)                      | 4.11                                                                               | 4.2E-08          |
| DUSP8     | ENSG00000184545   | 3.46        | 3.7E-13          | Dual specificity protein phosphatase 8                                         | Protein phosphatase (PC00195)                     | 3.07                                                                               | 5.8E-06          |
| COMP      | ENSG00000105664   | 11.02       | 1.3E-12          | Cartilage oligomeric matrix protein                                            |                                                   | 3.96                                                                               | 7.9E-07          |
| CR12      | ENSG00000074410   | 8.44        | 1.0E-11          | Carbonic anhydrase 12                                                          |                                                   | 4.34                                                                               | 1.8E-04          |
| MMIP9     | ENSG00000100395   | 3.53        | 1.8E-11          | Matrix metalloproteinase-9                                                     | Metalloproteinase (PC00153)                       | 2.29                                                                               | 1.4E-02          |
| NALCN     | ENSG00000102452   | 2.98        | 2.7E-11          | Sodium leak channel nonselective protein                                       | Ion channel (PC00133)                             | 3.03                                                                               | 3.1E-09          |
| FND1C1    | ENSG00000164694   | 2.96        | 6.3E-11          | Fibronectin type III domain-containing protein 1                               |                                                   | 2.64                                                                               | 9.7E-05          |
| AKR1B10   | ENSG00000198074   | 6.43        | 6.5E-11          | Aldo-keto reductase family 1 member B10                                        | Reductase (PC00198)                               | 5.50                                                                               | 2.4E-05          |
| CPZ       | ENSG00000109625   | 2.53        | 6.6E-11          | Carboxypeptidase Z                                                             | Protease (PC00190)                                | ns                                                                                 | ns               |
| ELK2AP    | ENSG00000213140   | 2.99        | 1.3E-10          |                                                                                |                                                   | ns                                                                                 | ns               |
| THY1      | ENSG00000154096   | 2.71        | 1.5E-10          | Thy-1 membrane glycoprotein                                                    | Cell adhesion molecule (PC00069)                  | 3.99                                                                               | 5.2E-10          |
| ITGBL1    | ENSG00000198542   | 2.77        | 5.9E-10          | Integrin beta-like protein 1                                                   | Integrin (PC00126)                                | 4.24                                                                               | 2.2E-13          |
| OLR1      | ENSG00000173391   | 3.57        | 6.0E-10          | Oxidized low-density lipoprotein receptor 1                                    |                                                   | 3.54                                                                               | 1.9E-04          |
| HKDC1     | ENSG00000156510   | 4.79        | 8.4E-10          | Hexokinase HKDC1                                                               | Kinase (PC00137)                                  | 4.43                                                                               | 1.8E-06          |
| FAM111B   | ENSG00000189057   | 2.85        | 9.6E-10          | Protein FAM111B                                                                |                                                   | 2.21                                                                               | 3.3E-03          |
| LPL       | ENSG00000175445   | 3.31        | 1.7E-09          | Lipoprotein lipase                                                             | Lipase (PC00143)                                  | 3.94                                                                               | 8.3E-04          |
| SPPI      | ENSG00000118785   | 2.71        | 1.9E-09          | Osteopontin                                                                    | Cytokine (PC00083)                                | 3.05                                                                               | 3.5E-05          |
| RRM2      | ENSG00000125222   | 2.52        | 2.3E-09          | Reductase                                                                      | Reductase (PC00198)                               | 1.78                                                                               | 4.4E-02          |
| SPR4      | ENSG00000106483   | 4.40        | 4.9E-09          | Ribonucleoside-diphosphate reductase subunit M2                                |                                                   | 3.31                                                                               | 9.1E-06          |
| EFEMP1    | ENSG00000115380   | 2.76        | 7.3E-09          | Secreted frizzled-related protein 4                                            | Transmembrane signal receptor (PC00197)           | 3.63                                                                               | 1.4E-07          |
| PADI1     | ENSG00000142623   | 8.48        | 8.0E-09          | EGF-containing fibulin-like extracellular matrix protein 1                     | Extracellular matrix structural protein (PC00103) | 3.63                                                                               | 1.4E-07          |
| KIF23     | ENSG00000137807   | 2.50        | 1.3E-08          | Protein-arginine deiminase type-1                                              |                                                   | ns                                                                                 | ns               |
| SLC22A12  | ENSG00000197891   | 5.18        | 1.5E-08          | Kinesin-like protein KIF23                                                     | Microtubule binding motor protein (PC00156)       | ns                                                                                 | ns               |
| LOXL1     | ENSG00000129038   | 2.67        | 1.9E-08          | Solute carrier family 22 member 12                                             | Secondary carrier transporter (PC00258)           | 3.23                                                                               | 5.0E-04          |
| KIF20A    | ENSG00000112984   | 2.54        | 2.3E-08          | Lysyl oxidase homolog 1                                                        | Oxidase (PC00175)                                 | 3.32                                                                               | 4.6E-08          |
| CFAP221   | ENSG00000163075   | 2.81        | 2.3E-08          | Kinesin-like protein KIF20A                                                    | Microtubule binding motor protein (PC00156)       | 1.72                                                                               | 4.7E-02          |
| CIDEA     | ENSG00000187288   | 3.51        | 3.2E-08          | Cilia- and flagella-associated protein 221                                     | Structural protein (PC00211)                      | 3.25                                                                               | 4.8E-10          |
| MCM10     | ENSG00000065328   | 2.94        | 3.3E-08          | Cell death activator CIDE-3                                                    |                                                   | 2.78                                                                               | 7.9E-04          |
| E2F8      | ENSG00000129173   | 3.22        | 4.1E-08          | Protein MCM10 homolog                                                          |                                                   | 2.16                                                                               | 1.2E-03          |
| MFAP2     | ENSG00000171222   | 2.85        | 5.2E-08          | Transcription factor E2F8                                                      | General transcription factor (PC00259)            | 1.82                                                                               | 3.0E-02          |
| FOXN4     | ENSG00000139445   | 3.50        | 5.3E-08          | Microtubular-associated protein 2                                              |                                                   | 2.74                                                                               | 1.6E-04          |
| FCGR1A    | ENSG00000150337   | 3.50        | 8.2E-08          | Forhead box protein N4                                                         |                                                   | 2.47                                                                               | 1.7E-02          |
| CDC45     | ENSG00000093039   | 2.79        | 9.6E-08          | High-affinity immunoglobulin gamma 1c receptor 1                               | Immunoglobulin receptor superfamily (PC00124)     | ns                                                                                 | ns               |
| ATP5VD2   | ENSG00000147614   | 3.82        | 1.0E-07          | Cell division control protein 45 homolog                                       | Replication origin binding protein (PC00199)      | 2.11                                                                               | 6.1E-04          |
| CHI3L1    | ENSG00000133048   | 2.95        | 1.5E-07          | V-type proton ATPase subunit d 2                                               | ATP synthase (PC00002)                            | ns                                                                                 | ns               |
| TRIM9     | ENSG00000100505   | 3.94        | 1.6E-07          | Chitinase-3-like protein 1                                                     | Glycosidase (PC00110)                             | 3.37                                                                               | 1.2E-04          |
| DCDC2     | ENSG00000146038   | 2.54        | 1.8E-07          | Ubiquitin-protein ligase TRIM9                                                 | Ubiquitin-protein ligase (PC00234)                | 2.52                                                                               | 3.5E-02          |
| TNFRSF9   | ENSG00000049249   | 2.58        | 1.8E-07          | Doublecortin domain-containing protein 2                                       |                                                   | 2.33                                                                               | 8.5E-07          |
| STMN2     | ENSG00000104435   | 5.22        | 1.9E-07          | Tumor necrosis factor receptor superfamily member 9                            | Transmembrane signal receptor (PC00197)           | ns                                                                                 | ns               |
| PAPP2A    | ENSG00000116183   | 4.80        | 2.0E-07          | Stathmin-2                                                                     |                                                   | 17.54                                                                              | 5.7E-17          |
| RASL11B   | ENSG00000128045   | 2.87        | 2.3E-07          | Pappalysin-2                                                                   |                                                   | ns                                                                                 | ns               |
| MOXD1     | ENSG00000079931   | 2.86        | 2.4E-07          | Ras-like protein family member 11B                                             |                                                   | 3.03                                                                               | 3.7E-06          |
| WBSCR17   | ENSG00000137269   | 3.54        | 6.7E-07          | DBH-like monoxygenase protein 1                                                | Hydroxylase (PC00122)                             | 3.72                                                                               | 1.2E-07          |
| LRR1C1    | ENSG00000100510   | 2.53        | 7.1E-07          | Leucine-rich repeat-containing protein 1                                       |                                                   | 4.91                                                                               | 5.3E-10          |
| MEOX1     | ENSG00000005102   | 3.90        | 7.2E-07          | Homeobox protein MOX1                                                          | Homeodomain transcription factor (PC00119)        | 2.49                                                                               | 1.9E-05          |
| ACS10     | ENSG00000169743   | 2.79        | 7.4E-07          | Acyl-coenzyme A synthetase ACS10-mitochondrial                                 | Ligase (PC00142)                                  | 2.86                                                                               | 2.0E-04          |
| RAB3B     | ENSG00000169213   | 3.29        | 7.9E-07          | Ras-related protein Rab-3B                                                     |                                                   | 2.96                                                                               | 2.6E-03          |
| EEF1A2    | ENSG00000101210   | 4.22        | 1.1E-06          | Elongation factor 1-alpha 2                                                    | Translation factor (PC00223)                      | 5.71                                                                               | 3.3E-04          |
| HECW1     | ENSG000001002746  | 3.19        | 1.1E-06          | E3 ubiquitin-protein ligase HECW1                                              | Ubiquitin-protein ligase (PC00234)                | 2.99                                                                               | 3.0E-06          |
| ROR2      | ENSG00000169071   | 3.09        | 1.2E-06          | Tyrosine-protein kinase transmembrane receptor ROR2                            | Transmembrane signal receptor (PC00197)           | 3.30                                                                               | 8.5E-07          |
| CCL19     | ENSG00000172724   | 2.78        | 1.2E-06          | C-C motif chemokine 19                                                         | Cytokine (PC00083)                                | 2.60                                                                               | 5.1E-03          |
| CDCA2     | ENSG00000184661   | 2.72        | 1.7E-06          | Cell division cycle-associated protein 2                                       |                                                   | 1.80                                                                               | 1.4E-02          |
| TMEM92    | ENSG00000167105   | 4.08        | 2.1E-06          | Transmembrane protein 92                                                       |                                                   | 2.89                                                                               | 5.6E-05          |
| CLEC5A    | ENSG00000258227   | 3.14        | 2.9E-06          | C-type lectin domain family 5 member A                                         |                                                   | 1.91                                                                               | 5.9E-03          |
| CFH25     | ENSG00000138135   | 2.91        | 3.2E-06          | Cholesterol 25-hydroxylase                                                     | Oxidase (PC00175)                                 | 2.70                                                                               | 2.0E-04          |
| EPCAM     | ENSG00000119888   | 2.57        | 3.2E-06          | Epithelial cell adhesion molecule                                              |                                                   | 3.57                                                                               | 9.9E-07          |
| MDF1      | ENSG00000112559   | 2.72        | 3.4E-06          | MyoD family inhibitor                                                          |                                                   | 3.23                                                                               | 4.3E-06          |
| LINC00319 | ENSG00000188660   | 3.22        | 3.8E-06          |                                                                                |                                                   | ns                                                                                 | ns               |
| DLGAP5    | ENSG00000126787   | 2.58        | 4.5E-06          | Disks large-associated protein 5                                               | Scaffold/adaptor protein (PC00226)                | 2.03                                                                               | 8.0E-03          |
| RAB25     | ENSG00000132698   | 3.70        | 4.7E-06          | Ras-related protein Rab-25                                                     |                                                   | 2.48                                                                               | 3.3E-03          |
| CHRNA1    | ENSG00000138435   | 4.58        | 6.8E-06          | Acetylcholine receptor subunit alpha                                           | Ligand-gated ion channel (PC00141)                | ns                                                                                 | ns               |
| CLIP2     | ENSG00000180161   | 3.42        | 8.2E-06          | Cartilage intermediate layer protein 2                                         |                                                   | 1.89                                                                               | 2.1E-02          |
| PDZK1IP1  | ENSG00000162366   | 2.66        | 8.3E-06          | PDZK1-interacting protein 1                                                    |                                                   | 4.61                                                                               | 1.2E-08          |
| EAD2R     | ENSG00000131080   | 2.50        | 9.8E-06          | Tumor necrosis factor receptor superfamily member 27                           |                                                   | 2.90                                                                               | 6.6E-05          |
| TRIM31    | ENSG00000204616   | 2.87        | 1.0E-05          | E3 ubiquitin-protein ligase TRIM31                                             | Ubiquitin-protein ligase (PC00234)                | 3.05                                                                               | 3.5E-03          |
| SLC2A14   | ENSG00000173262   | 2.67        | 1.3E-05          | Solute carrier family 2, facilitated glucose transporter member 14             |                                                   | 2.25                                                                               | 1.1E-04          |
| SLC2A5    | ENSG00000142583   | 2.84        | 1.3E-05          | Solute carrier family 2, facilitated glucose transporter member 5              |                                                   | ns                                                                                 | ns               |
| CDH16     | ENSG00000166589   | 5.65        | 1.4E-05          | Cadherin-16                                                                    | Cadherin (PC00057)                                | 2.62                                                                               | 4.0E-04          |
| GXYL2     | ENSG00000172986   | 4.06        | 2.2E-05          | Glucoside xylosyltransferase 2                                                 |                                                   | 1.88                                                                               | 3.8E-02          |
| CDCA7     | ENSG00000144354   | 2.85        | 2.6E-05          | Cell division cycle-associated protein 7                                       |                                                   | ns                                                                                 | ns               |
| CTSL1     | ENSG00000131094   | 2.90        | 3.6E-05          | C1q-related factor                                                             |                                                   | 2.44                                                                               | 4.3E-05          |
| KLHL4     | ENSG00000197705   | 2.69        | 3.7E-05          | Kelch-like protein 14                                                          |                                                   | ns                                                                                 | ns               |
| ADAMDEC1  | ENSG00000134028   | 3.09        | 4.9E-05          | ADAMDEC1                                                                       | Metalloproteinase (PC00153)                       | 2.44                                                                               | 3.6E-03          |
| FAP       | ENSG00000178088   | 2.98        | 6.2E-05          | Folyl endopeptidase FAP                                                        | Serine protease (PC00203)                         | 5.08                                                                               | 9.7E-10          |
| HCN1      | ENSG00000164588   | 2.78        | 6.0E-05          | Potassium/sodium hyperpolarization-activated cyclic nucleotide-gated channel 1 | Ion channel (PC00133)                             | ns                                                                                 | ns               |
| SLC6A11   | ENSG00000132164   | 9.91        | 6.0E-05          | Sodium- and chloride-dependent GABA transporter 3                              | Primary active transporter (PC00068)              | 3.92                                                                               | 1.2E-04          |
| CALCA     | ENSG00000110880   | 3.72        | 7.4E-05          | Calcitonin                                                                     | Peptide hormone (PC00179)                         | 2.12                                                                               | 7.6E-03          |
| C6orf223  | ENSG00000181577   | 6.04        | 7.9E-05          | Uncharacterized protein C6orf223                                               |                                                   | 9.57                                                                               | 2.0E-07          |
| CLIC6     | ENSG00000159212   | 2.58        | 9.9E-05          | Chloride intracellular channel protein 6                                       | Ion channel (PC00133)                             | 3.48                                                                               | 1.3E-08          |
| CCL20     | ENSG00000115009   | 3.40        | 1.0E-04          | C-C motif chemokine 20                                                         | Cytokine (PC00083)                                | 4.46                                                                               | 7.1E-06          |
| OSR1      | ENSG00000143867   | 3.37        | 1.3E-04          | Protein odd-skipped-related 1                                                  | Zinc finger transcription factor (PC00244)        | 2.50                                                                               | 7.1E-04          |
| MPP2      | ENSG00000108852   | 2.52        | 1.4E-04          | MAGUK p55 subfamily member 2                                                   | Scaffold/adaptor protein (PC00226)                | 1.71                                                                               | 4.5E-02          |
| KRT18     | ENSG00000167767   | 2.86        | 1.6E-04          | Keratin, type II cytoskeletal 18                                               |                                                   | 3.50                                                                               | 2.6E-07          |
| ACKR1     | ENSG00000213088   | 2.53        | 1.8E-04          | Atypical chemokine receptor 1                                                  | Transmembrane signal receptor (PC00197)           | 2.05                                                                               | 7.2E-03          |
| NTM       | ENSG00000182667   | 3.36        | 2.2E-04          | Neurotrimin                                                                    | Immunoglobulin (PC00123)                          | ns                                                                                 | ns               |
| CASP5     | ENSG00000137757   | 3.37        | 2.8E-04          | Caspase-5                                                                      | Protease (PC00190)                                | ns                                                                                 | ns               |
| KCNH2     | ENSG00000135118   | 2.71        | 3.5E-04          | Potassium voltage-gated channel subfamily H member 2                           | Ion channel (PC00133)                             | ns                                                                                 | ns               |
| TMEM178B  | ENSG00000281115   | 2.72        | 3.7E-04          | Transmembrane protein 178B                                                     |                                                   | 2.72                                                                               | 8.8E-04          |
| LDLRAD1   | ENSG00000203985   | 3.73        | 3.9E-04          | Low-density lipoprotein receptor class A domain-containing protein 1           |                                                   | ns                                                                                 | ns               |
| COL22A1   | ENSG00000189438   | 4.23        | 3.9E-04          | Collagen alpha-1(XII) chain                                                    | Extracellular matrix structural protein (PC00103) | ns                                                                                 | ns               |
| EGOT      | ENSG00000235947   | 3.98        | 4.4E-04          |                                                                                |                                                   | 2.49                                                                               | 6.8E-05          |
| PAGE4     | ENSG00000101951   | 4.85        | 5.0E-04          | P antigen family member 4                                                      |                                                   | 2.12                                                                               | 9.5E-03          |
| KRT6C     | ENSG00000170465   | 4.02        | 5.7E-04          | Keratin, type II cytoskeletal 6C                                               |                                                   | 2.25                                                                               | 1.6E-02          |
| AKR1B15   | ENSG00000227471   | 5.21        | 6.2E-04          | Aldo-keto reductase family 1 member B15                                        | Reductase (PC00198)                               | 2.46                                                                               | 2.5E-02          |
| TRPC6     | ENSG00000137672   | 2.88        | 6.2E-04          | Short transient receptor potential channel 6                                   | Ion channel (PC00133)                             | ns                                                                                 | ns               |
| KRT23     | ENSG00000263309   | 2.83        | 7.1E-04          | Keratin, type II cytoskeletal 23                                               |                                                   | ns                                                                                 | ns               |
| BDRR2     | ENSG00000168398   | 2.52        | 8.1E-04          | B2 bradykinin receptor                                                         | G-protein coupled receptor (PC00021)              | 3.08                                                                               | 4.1E-05          |
| KIRREL3   | ENSG00000149571   | 2.90        | 8.1E-04          | Kin of IRRE-like protein 3                                                     |                                                   | ns                                                                                 | ns               |
| ITGB6     | ENSG00000115221   | 2.72        | 8.4E-04          | Integrin beta-6                                                                | Integrin (PC00126)                                | 3.88                                                                               | 1.2E-07          |
| RTRN2     | ENSG00000162010   | 2.52        | 9.3E-04          | Rhotekin-2                                                                     | Nonmotor actin binding protein (PC00165)          | ns                                                                                 | ns               |
| ANKK2P3   | ENSG00000216740   | 2.89        | 1.1E-03          |                                                                                |                                                   | ns                                                                                 | ns               |
| APLP1     | ENSG00000105290   | 2.38        | 1.2E-03          | Amyloid-like protein 1                                                         | Protease inhibitor (PC00191)                      | ns                                                                                 | ns               |
| CAPN13    | ENSG00000162949   | 4.57        | 1.3E-03          | Calpain-13                                                                     | Cysteine protease (PC00081)                       | ns                                                                                 | ns               |
| GPR84     | ENSG00000139572   | 3.09        | 1.3E-03          | G-protein coupled receptor 84                                                  | G-protein coupled receptor (PC00021)              | ns                                                                                 | ns               |
| GABBR2    | ENSG00000136928   | 3.27        | 1.4E-03          | Gamma-aminobutyric acid type B receptor subunit 2                              | G-protein coupled receptor (PC00021)              | ns                                                                                 | ns               |
| LYPD1     | ENSG00000150551   | 3.34        | 2.1E-03          | Lyb6/PLAUR domain-containing protein 1                                         |                                                   | 2.10                                                                               | 1.7E-02          |
| FGF23     | ENSG00000118972</ |             |                  |                                                                                |                                                   |                                                                                    |                  |

|            |                 |      |         |                                                       |                                                       |      |         |
|------------|-----------------|------|---------|-------------------------------------------------------|-------------------------------------------------------|------|---------|
| PHEX       | ENSG00000102174 | 2.72 | 3.7E-03 | Phosphate-regulating neutral endopeptidase PHEX       | Metalloprotease (PC00153)                             | ns   | ns      |
| TUBB3      | ENSG00000258947 | 2.72 | 5.2E-03 | Tubulin beta-3 chain                                  | Tubulin (FC00229)                                     | ns   | ns      |
| COL11A1    | ENSG00000060718 | 3.57 | 6.2E-03 | Collagen alpha-1(XI) chain                            | Extracellular matrix structural protein (PC00103)     | 1.87 | 3.9E-02 |
| SMC1B      | ENSG00000077935 | 2.70 | 7.5E-03 | Structural maintenance of chromosomes protein 1B      |                                                       | ns   | ns      |
| PF4V1      | ENSG00000109272 | 2.60 | 8.1E-03 | Platelet factor 4 variant                             | Chemokine (PC00074)                                   | 2.16 | 3.7E-03 |
| ASCL1      | ENSG00000139352 | 3.53 | 9.1E-03 | Achaete-scute homolog 1                               | Basic helix-loop-helix transcription factor (PC00055) | ns   | ns      |
| TNFRSF13C  | ENSG00000159958 | 2.53 | 1.0E-02 | Tumor necrosis factor receptor superfamily member 13C | Transmembrane signal receptor (PC00197)               | ns   | ns      |
| TMEM132C   | ENSG00000181234 | 2.65 | 1.2E-02 | Transmembrane protein 132C                            |                                                       | 1.95 | 7.6E-03 |
| FCGR3C     |                 | 2.79 | 1.3E-02 |                                                       |                                                       | ns   | ns      |
| KCNA2      | ENSG00000177301 | 2.60 | 1.7E-02 | Potassium voltage-gated channel subfamily A member 2  | Voltage-gated ion channel (PC00241)                   | ns   | ns      |
| KRTAP5-AS1 | ENSG00000233930 | 2.50 | 1.7E-02 |                                                       |                                                       | 3.04 | 5.2E-05 |
| JPH1       | ENSG00000104369 | 2.52 | 2.0E-02 | Junctophilin-1                                        |                                                       | ns   | ns      |
| CDX1       | ENSG00000113722 | 2.50 | 2.1E-02 | Homeobox protein CDX-1                                | Homeodomain transcription factor (PC00119)            | ns   | ns      |
| FAM130A    |                 | 2.54 | 2.5E-02 | ALK and LTK ligand 1                                  |                                                       | ns   | ns      |
| GLIS1      | ENSG00000174332 | 2.84 | 2.5E-02 | Zinc finger protein GLIS1                             | DNA-binding transcription factor (PC00218)            | ns   | ns      |

Abbreviation: ADAM, a disintegrin and metalloproteinase domain-like protein; DBH, dopamine beta-hydroxylase; EGF, epidermal growth factor; GABA, gamma-aminobutyric acid; MAGUK, membrane-associated guanylate kinase; ns, not significant; PLAUR, plasminogen activator, urokinase receptor.

Supporting Table S3. Clinical and Serological Characteristics of 98 Biopsy-Proven NAFLD Patients Used for RNA Sequencing Analysis

| Variables                              | Fibrosis Stage |                   |                 |
|----------------------------------------|----------------|-------------------|-----------------|
|                                        | 0              | 1–2               | 3–4             |
| Number                                 | 8              | 77 (F1:51, F2:26) | 13 (F3:9, F4:4) |
| NAFL/NASH                              | 8/0            | 43/34             | 0/13            |
| Age (y)                                | 47.5 ± 7.03    | 53.4 ± 13.7       | 62 ± 10.6       |
| Sex (M/F)                              | 8/0            | 51/26             | 5/8             |
| BMI (kg/m <sup>2</sup> )               | 26.3 ± 3.52    | 26.7 ± 3.91       | 29.8 ± 5.41     |
| AST (U/L)                              | 31 ± 8.62      | 42.7 ± 20.2       | 52.1 ± 22.2     |
| ALT (U/L)                              | 58.1 ± 22.8    | 74.4 ± 49.6       | 73.2 ± 38.3     |
| GGT (U/L)                              | 105.4 ± 79.9   | 74.5 ± 54.9       | 94.5 ± 68.9     |
| ALP (U/L)                              | 247.5 ± 48.7   | 257.8 ± 70.3      | 267.6 ± 92.6    |
| Triglyceride (mg/dL)                   | 189.5 ± 124.3  | 165.9 ± 94.1      | 134.1 ± 59.1    |
| LDL-C (mg/dL)                          | 118.1 ± 43.2   | 126.2 ± 30.3      | 120.8 ± 28.4    |
| Fasting blood sugar (mg/dL)            | 106.1 ± 25.2   | 105.5 ± 26.9      | 114.8 ± 31.3    |
| HbA1c (%)                              | 6.00 ± 1.14    | 5.84 ± 0.84       | 6.5 ± 1.21      |
| AFP (ng/mL)                            | 2.99 ± 1.23    | 3.45 ± 1.56       | 4.99 ± 2.91     |
| Albumin (g/dL)                         | 4.60 ± 0.20    | 4.60 ± 0.31       | 4.39 ± 0.36     |
| Hyaluronic acid (ng/mL)                | 11.7 ± 12.8    | 26.1 ± 24.7       | 56.6 ± 34.5     |
| Platelet count (X 10 <sup>4</sup> /μL) | 24.3 ± 2.26    | 23.7 ± 6.43       | 16.0 ± 4.29     |
| NAFLD Fibrosis Score                   | -2.95 ± 0.77   | -2.52 ± 1.51      | -0.44 ± 1.20    |
| FIB-4 index                            | 0.81 ± 0.20    | 1.31 ± 0.91       | 2.73 ± 1.49     |

Abbreviations: AFP, alpha-fetoprotein; ALP, alkaline phosphatase; ALT, alanine aminotransferase; AST, aspartate aminotransferase; BMI, body mass index; F, female; GGT, γ-glutamyltranspeptidase; LDL-C, low-density lipoprotein cholesterol; M, male.

Supporting Table S4. Correlation Between THBS2 mRNA Levels and Clinicopathological Parameters of 98 Biopsy-Proven NAFLD Patients Used for RNA Sequencing Analysis

| Variables                            | <i>r</i> | <i>P</i> Value |
|--------------------------------------|----------|----------------|
| Age (y)                              | 0.237    | N.S.           |
| BMI (kg/m <sup>2</sup> )             | 0.264    | <0.05          |
| AST (U/L)                            | 0.387    | <0.05          |
| ALT (U/L)                            | 0.173    | N.S.           |
| GGT (U/L)                            | -0.068   | N.S.           |
| ALP (U/L)                            | 0.061    | N.S.           |
| Triglyceride (mg/dL)                 | -0.0293  | N.S.           |
| LDL-C (mg/dL)                        | -0.009   | N.S.           |
| Fasting blood sugar (mg/dL)          | 0.188    | N.S.           |
| HbA1c (%)                            | 0.193    | N.S.           |
| AFP (ng/mL)                          | 0.23     | N.S.           |
| Albumin (g/dL)                       | -0.156   | N.S.           |
| Hyaluronic acid (ng/mL)              | 0.395    | <0.05          |
| Platelet count (10 <sup>4</sup> /μL) | -0.331   | <0.05          |
| FIB-4 index                          | 0.446    | <0.05          |
| NAFLD Fibrosis Score                 | 0.401    | <0.05          |

Abbreviations: AFP, alpha-fetoprotein; ALP, alkaline phosphatase; ALT, alanine aminotransferase; AST, aspartate aminotransferase; BMI, body mass index; GGT,  $\gamma$ -glutamyltranspeptidase; LDL-C, low-density lipoprotein cholesterol; N.S., not significant.

Supporting Table S5. REACTOME Pathways Correlated With Intrahepatic THBS2 Level in 98 Biopsy-Proven NAFLD Patients

| REACTOME Pathways                                                                                                       | Correlation Coefficient With Intrahepatic THBS2 Level |
|-------------------------------------------------------------------------------------------------------------------------|-------------------------------------------------------|
| EXTRACELLULAR_MATRIX_ORGANIZATION                                                                                       | 0.905                                                 |
| INTEGRIN_CELL_SURFACE_INTERACTIONS                                                                                      | 0.904                                                 |
| COLLAGEN_DEGRADATION                                                                                                    | 0.899                                                 |
| CROSSLINKING_OF_COLLAGEN_FIBRILS                                                                                        | 0.896                                                 |
| ASSEMBLY_OF_COLLAGEN_FIBRILS_AND_OTHER_MULTIMERIC_STRUCTURES                                                            | 0.895                                                 |
| ECM_PROTEOGLYCANS                                                                                                       | 0.895                                                 |
| COLLAGEN_FORMATION                                                                                                      | 0.894                                                 |
| DEGRADATION_OF_THE_EXTRACELLULAR_MATRIX                                                                                 | 0.890                                                 |
| ELASTIC_FIBRE_FORMATION                                                                                                 | 0.877                                                 |
| COLLAGEN_CHAIN_TRIMERIZATION                                                                                            | 0.870                                                 |
| ANCHORING_FIBRIL_FORMATION                                                                                              | 0.868                                                 |
| NON_INTEGRIN_MEMBRANE_ECM_INTERACTIONS                                                                                  | 0.866                                                 |
| SIGNALING_BY_RECEPTOR_TYROSINE_KINASES                                                                                  | 0.864                                                 |
| COLLAGEN_BIOSYNTHESIS_AND_MODIFYING_ENZYMES                                                                             | 0.858                                                 |
| MOLECULES_ASSOCIATED_WITH_ELASTIC_FIBRES                                                                                | 0.856                                                 |
| SIGNALING_BY_PDGF                                                                                                       | 0.844                                                 |
| MET_ACTIVATES_PTK2_SIGNALING                                                                                            | 0.837                                                 |
| PLATELET_ADHESION_TO_EXPOSED_COLLAGEN                                                                                   | 0.835                                                 |
| MET_PROMOTES_CELL_MOTILITY                                                                                              | 0.830                                                 |
| O_GLYCOSYLATION_OF_TSR_DOMAIN_CONTAINING_PROTEINS                                                                       | 0.822                                                 |
| PLATELET_ACTIVATION_SIGNALING_AND_AGGREGATION                                                                           | 0.820                                                 |
| RESPONSE_TO_ELEVATED_PLATELET_CYTOSOLIC_CA2                                                                             | 0.819                                                 |
| DISEASES_OF_GLYCOSYLATION                                                                                               | 0.818                                                 |
| GP1B_IX_V_ACTIVATION_SIGNALING                                                                                          | 0.818                                                 |
| HS_GAG_DEGRADATION                                                                                                      | 0.818                                                 |
| HEMOSTASIS                                                                                                              | 0.817                                                 |
| DEFECTIVE_EXT2_CAUSES_EXOSTOSES_2                                                                                       | 0.814                                                 |
| PLATELET_AGGREGATION_PLUG_FORMATION                                                                                     | 0.813                                                 |
| SIGNALING_BY_MET                                                                                                        | 0.813                                                 |
| SEMAPHORIN_INTERACTIONS                                                                                                 | 0.812                                                 |
| DISEASES_ASSOCIATED_WITH_GLYCOSAMINOGLYCAN_METABOLISM                                                                   | 0.812                                                 |
| NCAM1_INTERACTIONS                                                                                                      | 0.802                                                 |
| POST_TRANSLATIONAL_PROTEIN_MODIFICATION                                                                                 | 0.796                                                 |
| GLYCOSAMINOGLYCAN_METABOLISM                                                                                            | 0.795                                                 |
| DISEASE                                                                                                                 | 0.791                                                 |
| L1CAM_INTERACTIONS                                                                                                      | 0.785                                                 |
| METABOLISM_OF_FAT_SOLUBLE_VITAMINS                                                                                      | 0.785                                                 |
| HS_GAG_BIOSYNTHESIS                                                                                                     | 0.784                                                 |
| LAMININ_INTERACTIONS                                                                                                    | 0.783                                                 |
| NUCLEAR_EVENTS_KINASE_AND_TRANSCRIPTION_FACTOR_ACTIVATION                                                               | 0.782                                                 |
| CASPASE_MEDIATED_CLEAVAGE_OF_CYTOSKELETAL_PROTEINS                                                                      | 0.780                                                 |
| HEPARAN_SULFATE_HEPARIN_HS_GAG_METABOLISM                                                                               | 0.778                                                 |
| SYNDECAN_INTERACTIONS                                                                                                   | 0.776                                                 |
| SCAVENGING_BY_CLASS_A_RECEPTORS                                                                                         | 0.775                                                 |
| MAPK_FAMILY_SIGNALING_CASCADES                                                                                          | 0.773                                                 |
| O_LINKED_GLYCOSYLATION                                                                                                  | 0.770                                                 |
| CHONDROITIN_SULFATE_DERMATAN_SULFATE_METABOLISM                                                                         | 0.770                                                 |
| CELL_CELL_COMMUNICATION                                                                                                 | 0.770                                                 |
| CELL_SURFACE_INTERACTIONS_AT_THE_VASCULAR_WALL                                                                          | 0.770                                                 |
| DISSOLUTION_OF_FIBRIN_CLOT                                                                                              | 0.770                                                 |
| DISEASES_OF_METABOLISM                                                                                                  | 0.766                                                 |
| EPH_EPHRIN_SIGNALING                                                                                                    | 0.762                                                 |
| NCAM_SIGNALING_FOR_NEURITE_OUT_GROWTH                                                                                   | 0.760                                                 |
| NERVOUS_SYSTEM_DEVELOPMENT                                                                                              | 0.751                                                 |
| REGULATION_OF_INSULIN_LIKE_GROWTH_FACTOR_IGF_TRANSPORT_AND_UPTAKE_BY_INSULIN_LIKE_GROWTH_FACTOR_BINDING_PROTEINS_IGFBPS | 0.751                                                 |

Supporting Table 6. Gene List in the Module That THBS2 Gene Belongs to Identified by WGCNA Analysis

| Gene     | Ensemble Gene ID | Gene Name                                                      | PANTHER Protein Class                                 |
|----------|------------------|----------------------------------------------------------------|-------------------------------------------------------|
| ADAM28   | ENSG0000042980   | Disintegrin and metalloproteinase domain-containing protein 28 | Metalloprotease (PC00153)                             |
| AEBP1    | ENSG00000106624  | Adipocyte enhancer-binding protein 1                           |                                                       |
| ANTXR1   | ENSG00000169604  | Anthrax toxin receptor 1                                       | Cell adhesion molecule (PC00069)                      |
| BHLHE41  | ENSG00000123095  | Class E basic helix-loop-helix protein 41                      | Basic helix-loop-helix transcription factor (PC00055) |
| BOC      | ENSG00000144857  | Brother of CDO                                                 |                                                       |
| C7       | ENSG00000112936  | Complement component C7                                        |                                                       |
| CACNA1C  | ENSG00000151067  | Voltage-dependent L-type calcium channel subunit alpha-1C      |                                                       |
| CCDC80   | ENSG00000091986  | Coiled-coil domain-containing protein 80                       |                                                       |
| CCL19    | ENSG00000172724  | C-C motif chemokine 19                                         | Cytokine (PC00083)                                    |
| CCL21    | ENSG00000137077  | C-C motif chemokine 21                                         | Cytokine (PC00083)                                    |
| CD1E     | ENSG00000158488  | T-cell surface glycoprotein CD1e, membrane-associated          |                                                       |
| CD79A    | ENSG00000105369  | B-cell antigen receptor complex-associated protein alpha chain | Immunoglobulin receptor superfamily (PC00124)         |
| CDH11    | ENSG00000140937  | Cadherin-11                                                    |                                                       |
| CH25H    | ENSG00000138135  | Cholesterol 25-hydroxylase                                     | Oxidase (PC00175)                                     |
| CLDN11   | ENSG00000013297  | Claudin-11                                                     | Tight junction (PC00214)                              |
| CLSTN2   | ENSG00000158258  | Calsyntenin-2                                                  | Membrane traffic protein (PC00150)                    |
| COL10A1  | ENSG00000123500  | Collagen alpha-1(X) chain                                      | Extracellular matrix structural protein (PC00103)     |
| COL12A1  | ENSG00000111799  | Collagen alpha-1(XII) chain                                    | Extracellular matrix structural protein (PC00103)     |
| COL14A1  | ENSG00000187955  | Collagen alpha-1(XIV) chain                                    | Extracellular matrix structural protein (PC00103)     |
| COL15A1  | ENSG00000204291  | Collagen alpha-1(XV) chain                                     | Extracellular matrix structural protein (PC00103)     |
| COL16A1  | ENSG00000084636  | Collagen alpha-1(XVI) chain                                    | Extracellular matrix structural protein (PC00103)     |
| COL1A1   | ENSG00000108821  | Collagen alpha-1(I) chain                                      | Extracellular matrix structural protein (PC00103)     |
| COL1A2   | ENSG00000164692  | Collagen alpha-2(I) chain                                      | Extracellular matrix structural protein (PC00103)     |
| COL4A1   | ENSG00000187498  | Collagen alpha-1(IV) chain                                     | Extracellular matrix structural protein (PC00103)     |
| COL4A3   | ENSG00000169031  | Collagen alpha-3(IV) chain                                     | Extracellular matrix structural protein (PC00103)     |
| COL4A4   | ENSG00000081052  |                                                                |                                                       |
| COL5A1   | ENSG00000130635  | Collagen alpha-1(V) chain                                      | Extracellular matrix structural protein(PC00103)      |
| CPXM2    | ENSG00000121898  | Inactive carboxypeptidase-like protein X2                      |                                                       |
| CPZ      | ENSG00000109625  | Carboxypeptidase Z                                             |                                                       |
| CRISPLD2 | ENSG00000103196  | Cysteine-rich secretory protein LCCL domain-containing 2       | Defense/immunity protein (PC00090)                    |
| DKK3     | ENSG00000050165  | Dickkopf-related protein 3                                     |                                                       |
| DTNA     | ENSG00000134769  | Dystrobrevin alpha                                             |                                                       |
| EFEMP1   | ENSG00000115380  | EGF-containing fibulin-like extracellular matrix protein 1     | Extracellular matrix structural protein (PC00103)     |
| ELK2AP   | ENSG00000213140  |                                                                |                                                       |
| EMP1     | ENSG00000134531  | Epithelial membrane protein 1                                  | Cytoskeletal protein (PC00085)                        |
| EPHA3    | ENSG00000044524  | Ephrin type-A receptor 3                                       |                                                       |
| F13A1    | ENSG00000124491  | Coagulation factor XIII A chain                                | Transferase (PC00220)                                 |
| F3       | ENSG00000117525  | Tissue factor                                                  | Transmembrane signal receptor (PC00197)               |
| FAP      | ENSG00000078098  | Prolyl endopeptidase                                           | Serine protease (PC00203)                             |
| FBLN5    | ENSG00000140092  | Fibulin-5                                                      | Extracellular matrix structural protein (PC00103)     |
| FCRL5    | ENSG00000143297  | Fc receptor-like protein 5                                     | Immunoglobulin receptor superfamily (PC00124)         |
| FHL2     | ENSG00000115641  | Four and a half LIM domains protein 2                          | Transcription cofactor (PC00217)                      |
| FMO2     | ENSG00000094963  | Dimethylaniline monooxygenase [N-oxide-forming] 2              | Oxygenase (PC00177)                                   |
| FNDC1    | ENSG00000164694  | Fibronectin type III domain-containing protein 1               |                                                       |
| FZD7     | ENSG00000155760  | Frizzled-7                                                     | Transmembrane signal receptor (PC00197)               |
| GEM      | ENSG00000164949  | GTP-binding protein GEM                                        |                                                       |
| GLIS2    | ENSG00000126603  | Zinc finger protein GLIS2                                      | C2H2 zinc finger transcription factor (PC00248)       |
| GPC3     | ENSG00000147257  | Glypican-3                                                     |                                                       |
| GPC4     | ENSG00000076716  | Glypican-4                                                     |                                                       |
| GSN      | ENSG00000148180  | Gelsolin                                                       | Nonmotor actin binding protein (PC00165)              |
| IgL5     | ENSG00000254709  | Immunoglobulin lambda-like polypeptide 5                       | Immunoglobulin (PC00123)                              |
| IGSF10   | ENSG00000152580  | Immunoglobulin superfamily member 10                           |                                                       |
| IRF4     | ENSG00000137265  | Interferon regulatory factor 4                                 | Winged helix/forkhead transcription factor (PC00246)  |
| ITGBL1   | ENSG00000198542  | Integrin beta-like protein 1                                   | Cell adhesion molecule (PC00069)                      |
| ITIH5    | ENSG00000123243  | Inter-alpha-trypsin inhibitor heavy chain H5                   | Protease inhibitor (PC00191)                          |
| JCHAIN   | ENSG00000132465  | Immunoglobulin J chain                                         | Immunoglobulin (PC00123)                              |
| KIAA1211 |                  | Cancer-related regulator of actin dynamics                     |                                                       |
| LAMA2    | ENSG00000196569  | Laminin subunit alpha-2                                        | Extracellular matrix protein (PC00102)                |
| LAMC3    | ENSG00000050555  | Laminin subunit gamma-3                                        | Extracellular matrix protein (PC00102)                |
| LOXL1    | ENSG00000129038  | Lysyl oxidase homolog 1                                        |                                                       |
| LOXL4    | ENSG00000138131  | Lysyl oxidase homolog 4                                        |                                                       |
| LRRC1    | ENSG00000137269  | Leucine-rich repeat-containing protein 1                       |                                                       |
| LTBP2    | ENSG00000119681  | Latent-transforming growth factor beta-binding protein 2       | Extracellular matrix structural protein (PC00103)     |
| LUM      | ENSG00000139329  | Lumican                                                        |                                                       |
| MAP1A    | ENSG00000166963  | Microtubule-associated protein 1A                              | Nonmotor microtubule binding protein (PC00166)        |
| MAP1B    | ENSG00000131711  | Microtubule-associated protein 1B                              | Nonmotor microtubule binding protein (PC00166)        |
| MFAP4    | ENSG00000166482  | Microfibril-associated glycoprotein 4                          | Intercellular signal molecule (PC00207)               |
| MMP2     | ENSG00000087245  | 72 kDa type IV collagenase                                     | Metalloprotease (PC00153)                             |
| MOXD1    | ENSG00000079931  | DBH-like monooxygenase protein 1                               |                                                       |
| MZB1     | ENSG00000170476  | Marginal zone B- and B1-cell-specific protein                  |                                                       |
| NALCN    | ENSG00000102452  | Sodium leak channel non-selective protein                      |                                                       |
| NAV3     | ENSG00000067798  | Neuron navigator 3                                             |                                                       |
| NEXN     | ENSG00000162614  | Nexilin                                                        | Scaffold/adaptor protein (PC00226)                    |
| NFASC    | ENSG00000163531  | Neurofascin                                                    |                                                       |
| OSMR     | ENSG00000145623  | Oncostatin-M-specific receptor subunit beta                    | Cytokine (PC00083)                                    |
| PAQR5    | ENSG00000137819  | Membrane progesterin receptor gamma                            | G-protein coupled receptor (PC00021)                  |
| PLCXD3   | ENSG00000182836  | PI-PLC X domain-containing protein 3                           |                                                       |
| PODN     | ENSG00000174348  | Podocan                                                        |                                                       |
| PODXL    | ENSG00000128567  | Podocalyxin                                                    | Cell adhesion molecule (PC00069)                      |
| PTK7     | ENSG00000112655  | Inactive tyrosine-protein kinase 7                             | Tyrosine protein kinase receptor (PC00233)            |
| ROR2     | ENSG00000169071  | Tyrosine-protein kinase transmembrane receptor ROR2            |                                                       |

|        |                 |                                                                          |                                             |
|--------|-----------------|--------------------------------------------------------------------------|---------------------------------------------|
| RRAD   | ENSG00000166592 | GTP-binding protein RAD                                                  |                                             |
| SEMA3C | ENSG00000075223 | Semaphorin-3C                                                            | Membrane-bound signaling molecule (PC00152) |
| SFRP4  | ENSG00000106483 | Secreted frizzled-related protein 4                                      | Transmembrane signal receptor (PC00197)     |
| SGCD   | ENSG00000170624 | Delta-sarcoglycan                                                        | Cytoskeletal protein (PC00085)              |
| SLIT2  | ENSG00000145147 | Slit homolog 2 protein                                                   |                                             |
| SPON1  | ENSG00000262655 | Spondin-1                                                                | Cell adhesion molecule (PC00069)            |
| SPP1   | ENSG00000118785 | Osteopontin                                                              | Cytokine (PC00083)                          |
| SSC5D  | ENSG00000179954 | Soluble scavenger receptor cysteine-rich domain-containing protein SSC5D | Serine protease (PC00203)                   |
| STMN2  | ENSG00000104435 | Stathmin-2                                                               |                                             |
| SUSD2  | ENSG00000099994 | Sushi domain-containing protein 2                                        |                                             |
| THBD   | ENSG00000178726 | Thrombomodulin                                                           | Transmembrane signal receptor (PC00197)     |
| THBS1  | ENSG00000137801 | Thrombospondin-1                                                         |                                             |
| THBS2  | ENSG00000186340 | Thrombospondin-2                                                         |                                             |
| THY1   | ENSG00000154096 | Thy-1 membrane glycoprotein                                              | Cell adhesion molecule (PC00069)            |
| TNXB   | ENSG00000206258 | Tenascin-X                                                               | Extracellular matrix protein (PC00102)      |
| VCAN   | ENSG00000038427 | Versican core protein                                                    | Extracellular matrix glycoprotein (PC00100) |
| VWF    | ENSG00000110799 | von Willebrand factor                                                    | Extracellular matrix protein (PC00102)      |
| WNT4   | ENSG00000162552 | Protein Wnt-4                                                            | Intercellular signal molecule (PC00207)     |

Abbreviation: CDO, cysteine dioxygenase; DBH, dopamine beta-hydroxylase; EGF, epidermal growth factor; GTP, guanosine triphosphate; ID, identifier; PI-PLC, phosphoinositide phospholipase C; WGCNA, weighted correlation network analysis.



Supporting Table S7. Correlation Between mRNA Levels of THBS2 and Collagen Genes in the Module

| Variables | <i>r</i> | <i>P</i> Value |
|-----------|----------|----------------|
| COL1A1    | 0.899    | <0.05          |
| COL1A2    | 0.912    | <0.05          |
| COL4A1    | 0.863    | <0.05          |
| COL4A3    | 0.558    | <0.05          |
| COL4A4    | 0.741    | <0.05          |
| COL5A1    | 0.871    | <0.05          |
| COL10A1   | 0.77     | <0.05          |
| COL12A1   | 0.742    | <0.05          |
| COL14A1   | 0.808    | <0.05          |
| COL15A1   | 0.675    | <0.05          |
| COL16A1   | 0.793    | <0.05          |

Supporting Table S8. Clinical and Serological Characteristics of 213 Biopsy-Proven NAFLD Patients

| Variables                              | NAFL          | NASH          | <i>P</i> Value |
|----------------------------------------|---------------|---------------|----------------|
| Number                                 | 121           | 92            |                |
| Matteoni classification (1/2/3/4)      | 94/27/0/0     | 0/0/35/57     |                |
| Age (y)                                | 58.0 ± 12.5   | 66.3 ± 12.1   | <0.05          |
| Sex (M/F)                              | 47/74         | 31/61         | N.S.           |
| BMI (kg/m <sup>2</sup> )               | 27.4 ± 4.04   | 27.8 ± 5.61   | N.S.           |
| AST (U/L)                              | 48.4 ± 24.6   | 68.7 ± 32.2   | <0.05          |
| ALT (U/L)                              | 72.8 ± 40.5   | 88.3 ± 56.6   | <0.05          |
| GGT (U/L)                              | 84.1 ± 74.2   | 94.8 ± 69.4   | N.S.           |
| ALP (U/L)                              | 278.0 ± 102.5 | 285.1 ± 103.9 | N.S.           |
| Triglyceride (mg/dL)                   | 166.5 ± 82.6  | 178.3 ± 77.4  | N.S.           |
| LDL-C (mg/dL)                          | 131.4 ± 34.3  | 126.1 ± 30.7  | N.S.           |
| Fasting blood sugar (mg/dL)            | 114.7 ± 33.3  | 124.7 ± 52.3  | N.S.           |
| HbA1c (%)                              | 6.30 ± 0.92   | 6.61 ± 1.63   | N.S.           |
| AFP (ng/mL)                            | 3.84 ± 1.83   | 5.35 ± 2.99   | <0.05          |
| Albumin (g/dL)                         | 4.42 ± 0.28   | 4.29 ± 0.36   | <0.05          |
| Hyaluronic acid (ng/mL)                | 55.7 ± 67.6   | 130.2 ± 138.6 | <0.05          |
| Platelet count (X 10 <sup>4</sup> /μL) | 25.0 ± 7.10   | 19.5 ± 6.63   | <0.05          |
| FIB-4 index                            | 1.56 ± 1.16   | 2.91 ± 1.61   | <0.05          |
| NAFLD activity score                   | 2.50 ± 0.93   | 4.25 ± 1.21   | <0.05          |

Abbreviations: AFP, alpha-fetoprotein; ALP, alkaline phosphatase; ALT, alanine aminotransferase; AST, aspartate aminotransferase; BMI, body mass index; F, female; GGT, γ-glutamyltranspeptidase; LDL-C, low-density lipoprotein cholesterol; M, male; N.S., not significant.

Supporting Table S9. Clinical and Serological Characteristics of 213 Biopsy-Proven NAFLD Patients Stratified by Fibrosis Stage

| Variables                              | Fibrosis Stage |               |               |               |              |
|----------------------------------------|----------------|---------------|---------------|---------------|--------------|
|                                        | 0              | 1             | 2             | 3             | 4            |
| Number                                 | 86             | 55            | 21            | 34            | 17           |
| NAFL/NASH                              | 82/4           | 24/31         | 4/17          | 8/26          | 3/14         |
| Age (y)                                | 58.6 ± 13.5    | 61.0 ± 13.3   | 65.0 ± 12.8   | 65.3 ± 10.1   | 67.1 ± 11.0  |
| Sex (M/F)                              | 35/51          | 18/37         | 5/16          | 15/19         | 5/12         |
| BMI (kg/m <sup>2</sup> )               | 26.8 ± 3.89    | 27.7 ± 4.24   | 27.3 ± 3.44   | 28.2 ± 5.57   | 30.6 ± 8.27  |
| AST (U/L)                              | 45.5 ± 21.9    | 63.3 ± 33.9   | 75.4 ± 29.2   | 65.1 ± 31.1   | 57.6 ± 29.5  |
| ALT (U/L)                              | 70.5 ± 38.7    | 95.9 ± 62.6   | 94.0 ± 41.1   | 79.2 ± 47.8   | 54.6 ± 31.4  |
| GGT (U/L)                              | 78.7 ± 70.5    | 87.7 ± 71.1   | 123.2 ± 74.0  | 104.6 ± 82.9  | 67.9 ± 38.2  |
| ALP (U/L)                              | 274.1 ± 104.2  | 283.5 ± 105.3 | 298.3 ± 99.3  | 290.5 ± 104.3 | 268.1 ± 96.4 |
| Triglyceride (mg/dL)                   | 172.8 ± 82.5   | 179.2 ± 75.6  | 173 ± 67.6    | 181.1 ± 95.2  | 120.4 ± 50.5 |
| LDL-C (mg/dL)                          | 132.4 ± 34.8   | 137.2 ± 30.3  | 120.1 ± 31.9  | 123.4 ± 29.5  | 107.8 ± 27.6 |
| Fasting blood sugar (mg/dL)            | 118.1 ± 38.7   | 116.7 ± 46.9  | 106.6 ± 30.1  | 129.6 ± 47.0  | 125.2 ± 51.1 |
| HbA1c (%)                              | 6.27 ± 0.89    | 6.50 ± 1.50   | 6.08 ± 0.83   | 6.91 ± 1.63   | 6.52 ± 1.66  |
| AFP (ng/mL)                            | 4.03 ± 2.56    | 3.96 ± 2.03   | 5.04 ± 2.67   | 5.52 ± 2.34   | 6.10 ± 2.94  |
| Albumin (g/dL)                         | 4.42 ± 0.28    | 4.44 ± 0.30   | 4.26 ± 0.23   | 4.27 ± 0.43   | 4.15 ± 0.33  |
| Hyaluronic acid (ng/mL)                | 51.5 ± 72.8    | 53.9 ± 56.4   | 127.4 ± 102.2 | 142.9 ± 140.9 | 225 ± 178.7  |
| Platelet count (X 10 <sup>4</sup> /μL) | 25.3 ± 6.96    | 23.8 ± 6.82   | 21.2 ± 9.0    | 19.2 ± 4.16   | 13.7 ± 4.44  |
| FIB-4 index                            | 1.45 ± 0.87    | 1.92 ± 1.26   | 2.94 ± 1.62   | 2.70 ± 1.42   | 4.29 ± 2.19  |
| NAFLD Fibrosis Score                   | -2.17 ± 1.45   | -1.67 ± 1.43  | -1.25 ± 1.45  | -0.60 ± 1.05  | 0.80 ± 1.13  |

Abbreviations: AFP, alpha-fetoprotein; ALP, alkaline phosphatase; ALT, alanine aminotransferase; AST, aspartate aminotransferase; BMI, body mass index; F, female; GGT, γ-glutamyltranspeptidase; LDL-C, low-density lipoprotein cholesterol; M, male.

Supporting Table S10. Correlation Between Serum TSP-2 Levels and Clinicopathological Parameters Among 213 Biopsy-Proven NAFLD Patients

| Variables                            | <i>r</i> | <i>P</i> Value |
|--------------------------------------|----------|----------------|
| Age (y)                              | 0.143    | N.S.           |
| BMI (kg/m <sup>2</sup> )             | 0.153    | N.S.           |
| AST (U/L)                            | 0.349    | <0.05          |
| ALT (U/L)                            | 0.085    | N.S.           |
| GGT (U/L)                            | 0.108    | N.S.           |
| ALP (U/L)                            | 0.055    | N.S.           |
| Triglyceride (mg/dL)                 | 0.067    | N.S.           |
| LDL-C (mg/dL)                        | -0.216   | <0.05          |
| Fasting blood sugar (mg/dL)          | 0.059    | N.S.           |
| HbA1c (%)                            | 0.105    | N.S.           |
| AFP (ng/mL)                          | 0.282    | <0.05          |
| Albumin (g/dL)                       | -0.222   | <0.05          |
| Hyaluronic acid (ng/mL)              | 0.378    | <0.05          |
| Platelet count (10 <sup>4</sup> /μL) | -0.201   | <0.05          |
| FIB-4 index                          | 0.435    | <0.05          |
| NAFLD Fibrosis Score                 | 0.335    | <0.05          |

Abbreviations: AFP, alpha-fetoprotein; ALP, alkaline phosphatase; ALT, alanine aminotransferase; AST, aspartate aminotransferase; BMI, body mass index; F, female; GGT, γ-glutamyltranspeptidase; LDL-C, low-density lipoprotein cholesterol; M, male; N.S., not significant.

1 **Supporting Figure S1.** Pathway analysis focusing on gene ontology biological  
2 processes enriched in the RNA sequencing data of liver tissues from 98 patients  
3 with biopsy-proven NAFLD. Significantly upregulated and downregulated  
4 pathways in NASH patients compared to NAFL patients are shown in red and  
5 green, respectively, with *P* values.

6

7 **Supporting Figure S2.** CIBERSORT analysis of the RNA sequencing data of  
8 liver tissues from 98 patients with biopsy-proven NAFLD. **(A)** Estimated  
9 intrahepatic population of each immune cell type in 98 NAFLD patients. **(B)**  
10 Absolute immune score and estimated intrahepatic relative fraction of M1  
11 macrophages, M2 macrophages, NK cells, mast cells, and dendritic cells in NAFL  
12 ( $n = 51$ ) and NASH ( $n = 47$ ) patients ( $*P < 0.05$ ).

13

14 **Supporting Figure S3.** Heatmap showing the intrahepatic expression of 63  
15 genes registered in the cytokine–cytokine receptor interaction pathway in the  
16 Kyoto Encyclopedia of Genes and Genomes database in 98 patients with biopsy-  
17 proven NAFLD.

18

19 **Supporting Figure S4. (A)** mRNA expression levels of *THBS2* were evaluated  
20 by qPCR in 98 NAFLD patients ( $*P < 0.05$ ). **(B)** Receiver operating characteristic  
21 curve for qPCR-based intrahepatic *THBS2* mRNA levels for the diagnosis of  
22 NASH among 98 NAFLD patients. The AUROC is shown.

23

24 **Supporting Figure S5.** Total 98 NAFLD patients were diagnosed based on  
25 NAFLD activity score (NAS). Patients with NAS score of equal or above 5 were  
26 defined as NASH. **(A)** mRNA expression levels of *THBS2* by RNA sequencing  
27 ( $*P < 0.05$ ). **(B)** Receiver operating characteristic curve for intrahepatic *THBS2*  
28 mRNA levels for the diagnosis of NASH among 98 NAFLD patients. The AUROC  
29 is shown.

30

31 **Supporting Figure S6. (A)** mRNA expression levels of *THBS2* by RNA  
32 sequencing in 206 NAFLD patients ( $*P < 0.05$ ) (GSE135251). **(B)** Receiver  
33 operating characteristic curve for intrahepatic *THBS2* mRNA levels for the  
34 diagnosis of NASH among 206 NAFLD patients. The AUROC is shown.

35

36 **Supporting Figure S7.** Principle component analysis of the RNA sequencing  
37 data of liver tissues from 98 patients with biopsy-proven NAFLD stratified by  
38 fibrosis stage.

39

40 **Supporting Figure S8.** Venn diagram showing comparisons among significantly  
41 upregulated genes in NAFLD patients (stage F1–2 versus F0; stage F3–4 versus  
42 F1–2) and predicted secreted proteins registered in the Human Protein Atlas  
43 database.

44

45 **Supporting Figure S9. (A)** mRNA expression levels of *THBS2* were evaluated  
46 by qPCR in 98 NAFLD patients ( $*P < 0.05$ ). **(B)** Receiver operating characteristic  
47 curve for qPCR-based intrahepatic *THBS2* mRNA levels for the diagnosis of  
48 advanced fibrosis (F3–4) among 98 NAFLD patients. The AUROC is shown.

49

50 **Supporting Figure S10. (A)** mRNA expression levels of *THBS2* were evaluated  
51 by RNA sequencing in 206 NAFLD patients ( $*P < 0.05$ ) (GSE135251). **(B)**  
52 Receiver operating characteristic curve for RNA sequencing–based intrahepatic

53 *THBS2* mRNA levels (**left**) and FIB-4 index (**right**) for the diagnosis of advanced  
54 fibrosis (F3–4) among 206 NAFLD patients. The AUROC is shown.

55

56 **Supporting Figure S11.** Heatmap showing 10 modules identified by the  
57 weighted correlation network analysis of the transcriptome data of liver tissues  
58 from 98 patients with biopsy-proven NAFLD. *THBS2* belonged to module 4  
59 highlighted in the red box.

60

61 **Supporting Figure S12. (A–B)** Correlation between intrahepatic *THBS2* and  
62 *COL1A1* (**A**) or *COL1A2* (**B**) mRNA levels examined by qPCR in 98 NAFLD  
63 patients.

64

65 **Supporting Figure S13. (A–B)** Correlation between intrahepatic *THBS2* and  
66 *COL1A1* (**A**) or *COL1A2* (**B**) mRNA levels examined by RNA sequence in 206  
67 NAFLD patients (GSE135251).

68

69 **Supporting Figure S14.** Correlation of serum TSP-2 levels with hepatic *THBS2*  
70 mRNA levels in 27 NAFLD patients.



71

72 **Supporting Figure S15.** Total 213 NAFLD patients were diagnosed based on  
73 NAFLD activity score (NAS). Patients with NAS score of equal or above 5 were  
74 defined as NASH. **(A)** Relative serum TSP-2 levels ( $*P < 0.05$ ). **(B)** Receiver  
75 operating characteristic curve of the performance of serum TSP-2 levels in the  
76 diagnosis of NASH among 213 patients with biopsy-proven NAFLD. The AUROC  
77 is shown.

78

79 **Supporting Figure S16. (A)** Correlation of serum TSP-2 levels with serum AST  
80 levels in 51 NAFLD patients with advanced fibrosis (F3–4). **(B)** Serum TSP-2  
81 levels in NAFLD patients based on the existence of hepatocyte ballooning ( $*P <$   
82  $0.05$ ).

83

## **Supplementary Materials and Methods**

### **qPCR**

Total RNA was reverse transcribed using the ReverTra Ace qPCR RT Kit (Toyobo, Tokyo, Japan) to synthesize complementary DNA. The TaqMan gene expression assay was used to analyze the expression of the following mRNAs: human *ACTB* (Hs01060665), human *THBS2* (Hs01568063), human *COL1A1* (Hs00164004), and human *COL1A2* (Hs01028969). Human gene expression levels were normalized to *ACTB* expression levels.

### **Enzyme-linked immunosorbent assay**

Serum TSP-2 levels were examined by enzyme-linked immunosorbent assay using human TSP-2 enzyme-linked immunosorbent assay kits (R&D Systems, Minneapolis, MN) following the manufacturer's protocols.

### **Laboratory testing**

The FIB-4 index was calculated as reported (age [years] x AST [U/L]/platelet count [x10<sup>9</sup>/L]/√ALT [U/L]).<sup>(1)</sup> NFS was calculated as reported (−1.675 + 0.037 x

age [years] + 0.094 x body mass index [kg/m<sup>2</sup>] + 1.13 x impaired fasting glycemia/diabetes mellitus [yes = 1, no = 0] + 0.99 x AST [U/L]/ALT [U/L] – 0.013 x platelet count [x10<sup>9</sup>/L] – 0.66 x Alb [g/dL]).<sup>(2)</sup>

### **Bioinformatic analysis**

Unsupervised hierarchical clustering, principal component analysis, detection of differentially expressed genes, generally applicable gene set enrichment pathway analysis focusing on gene ontology biological processes, and weighted correlation network analysis of the RNA sequencing data were performed using iDEP92 (<http://bioinformatics.sdstate.edu/idep92/>).<sup>(3-5)</sup> Single-sample gene set enrichment analysis<sup>(6)</sup> was performed using Gene Pattern (<https://cloud.genepattern.org/gp/pages/index.jsf>)<sup>(7)</sup>. CIBERSORT analysis<sup>(8)</sup> using RNA sequencing data was performed to estimate intrahepatic immune cell infiltration.

1. Shah AG, Lydecker A, Murray K, Tetri BN, Contos MJ, Sanyal AJ, Nash Clinical Research N. Comparison of noninvasive markers of fibrosis in patients

with nonalcoholic fatty liver disease. *Clin Gastroenterol Hepatol* 2009;7:1104-1112.

2. Angulo P, Hui JM, Marchesini G, Bugianesi E, George J, Farrell GC, et al. The NAFLD fibrosis score: a noninvasive system that identifies liver fibrosis in patients with NAFLD. *Hepatology* 2007;45:846-854.

3. Ge SX, Son EW, Yao R. iDEP: an integrated web application for differential expression and pathway analysis of RNA-Seq data. *BMC Bioinformatics* 2018;19:534.

4. Langfelder P, Horvath S. WGCNA: an R package for weighted correlation network analysis. *BMC Bioinformatics* 2008;9:559.

5. Luo W, Friedman MS, Shedden K, Hankenson KD, Woolf PJ. GAGE: generally applicable gene set enrichment for pathway analysis. *BMC Bioinformatics* 2009;10:161.

6. Barbie DA, Tamayo P, Boehm JS, Kim SY, Moody SE, Dunn IF, et al. Systematic RNA interference reveals that oncogenic KRAS-driven cancers require TBK1. *Nature* 2009;462:108-112.

7. Reich M, Liefeld T, Gould J, Lerner J, Tamayo P, Mesirov JP. GenePattern 2.0. *Nat Genet* 2006;38:500-501.

8. Chen B, Khodadoust MS, Liu CL, Newman AM, Alizadeh AA. Profiling Tumor Infiltrating Immune Cells with CIBERSORT. *Methods Mol Biol* 2018;1711:243-259.

● Down ● Up

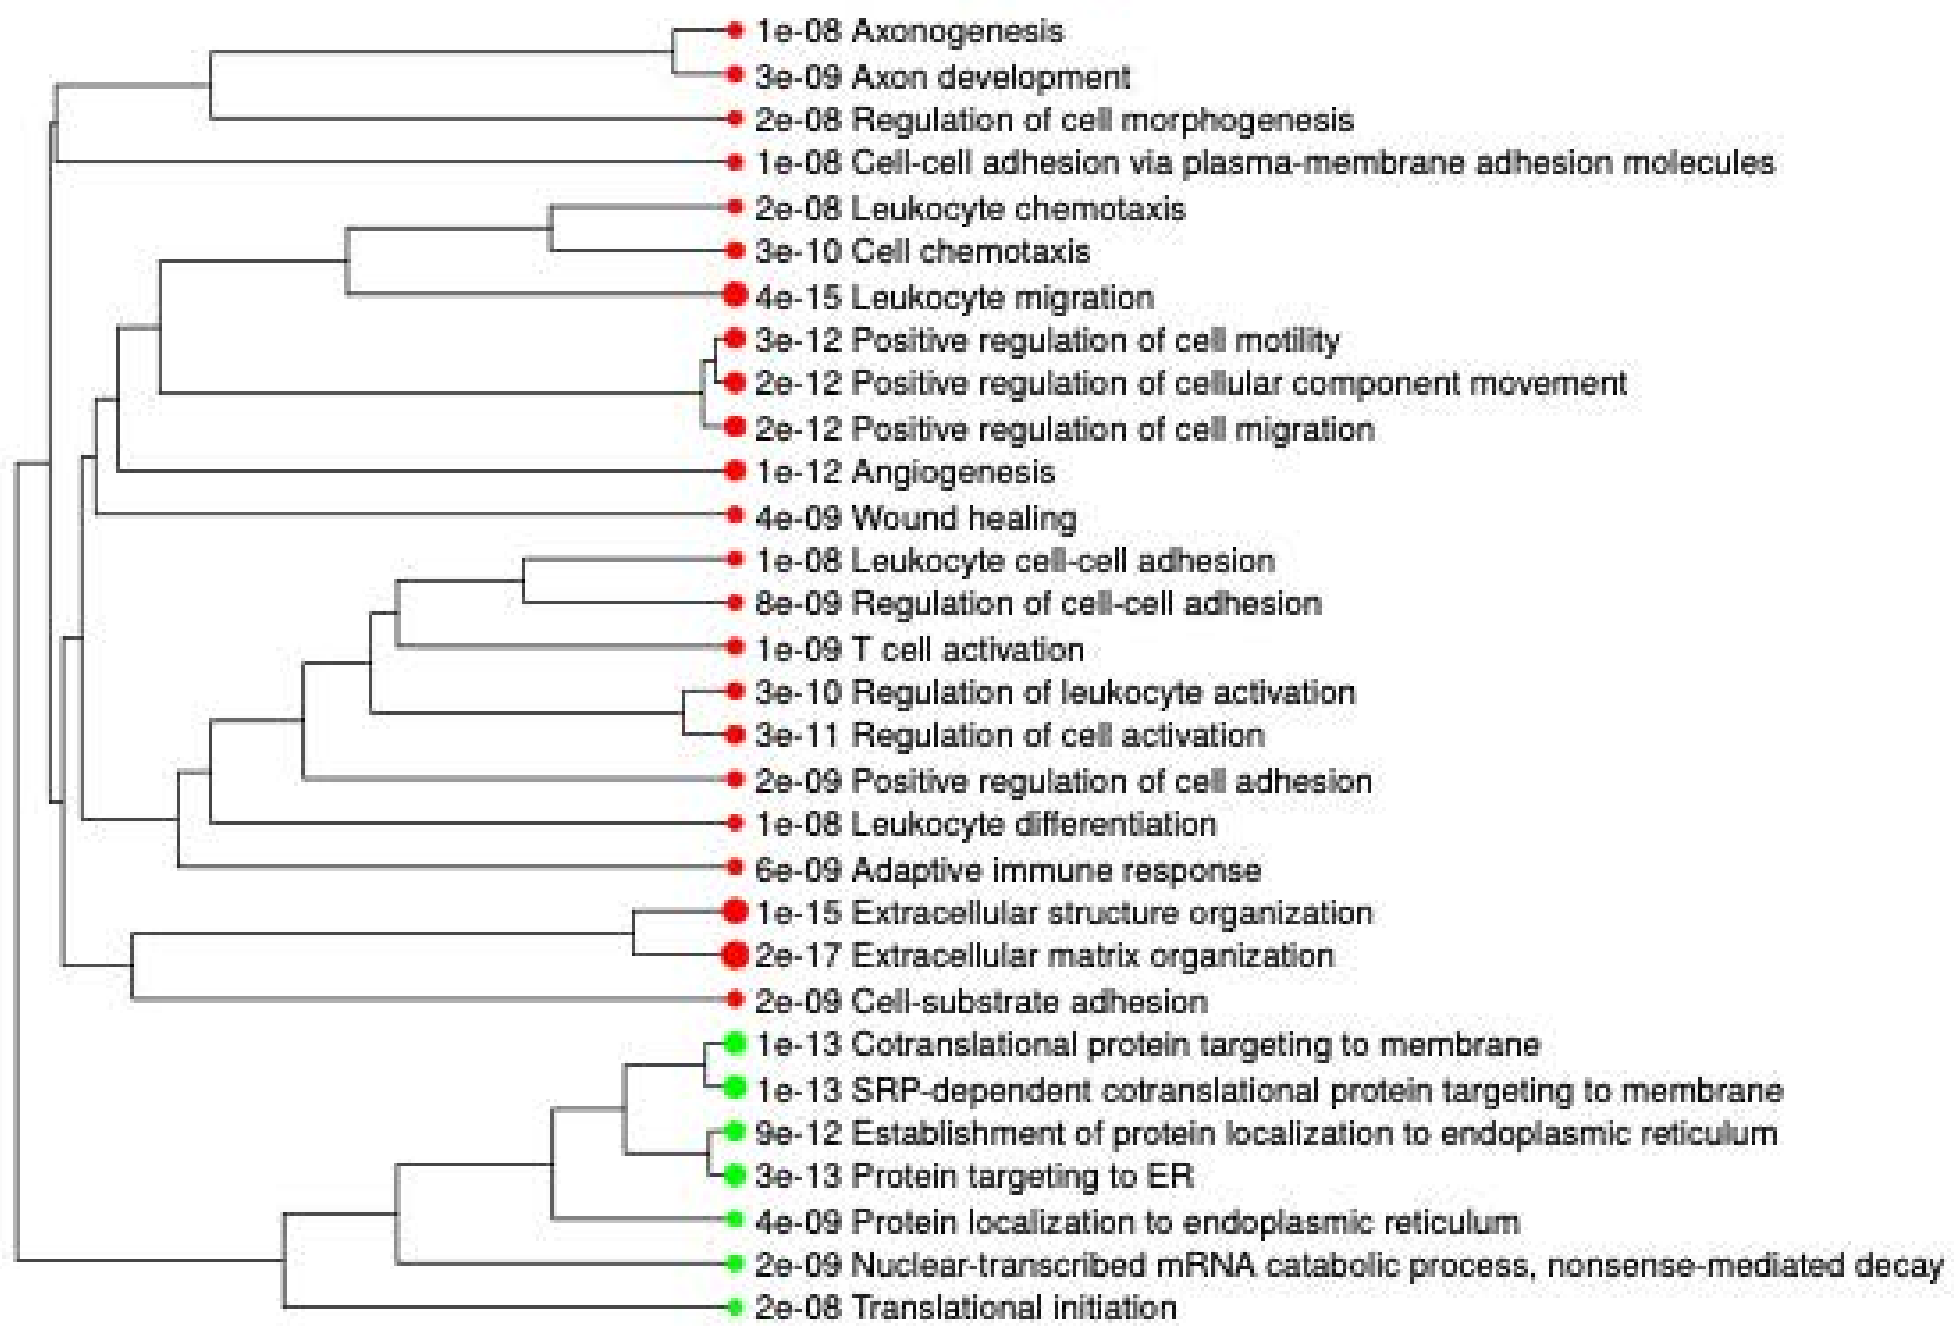

**Supplementary Figure 1**

**A**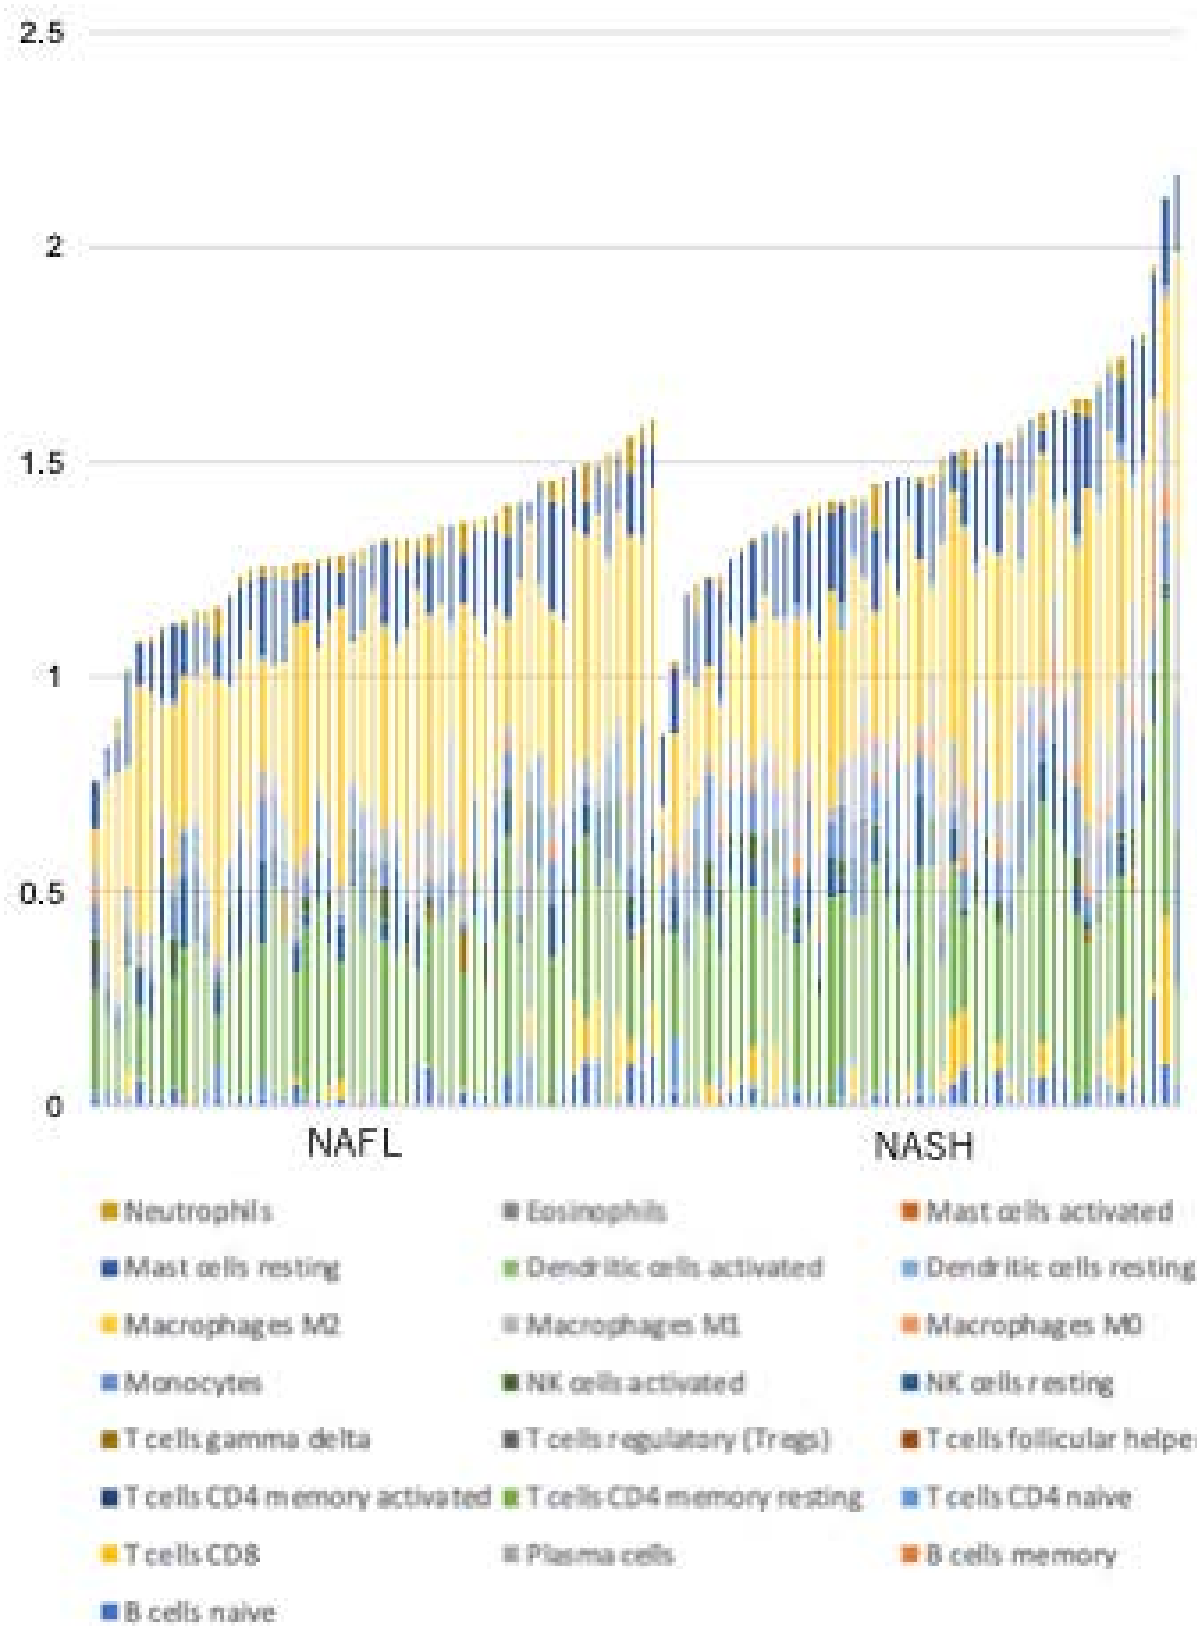**B**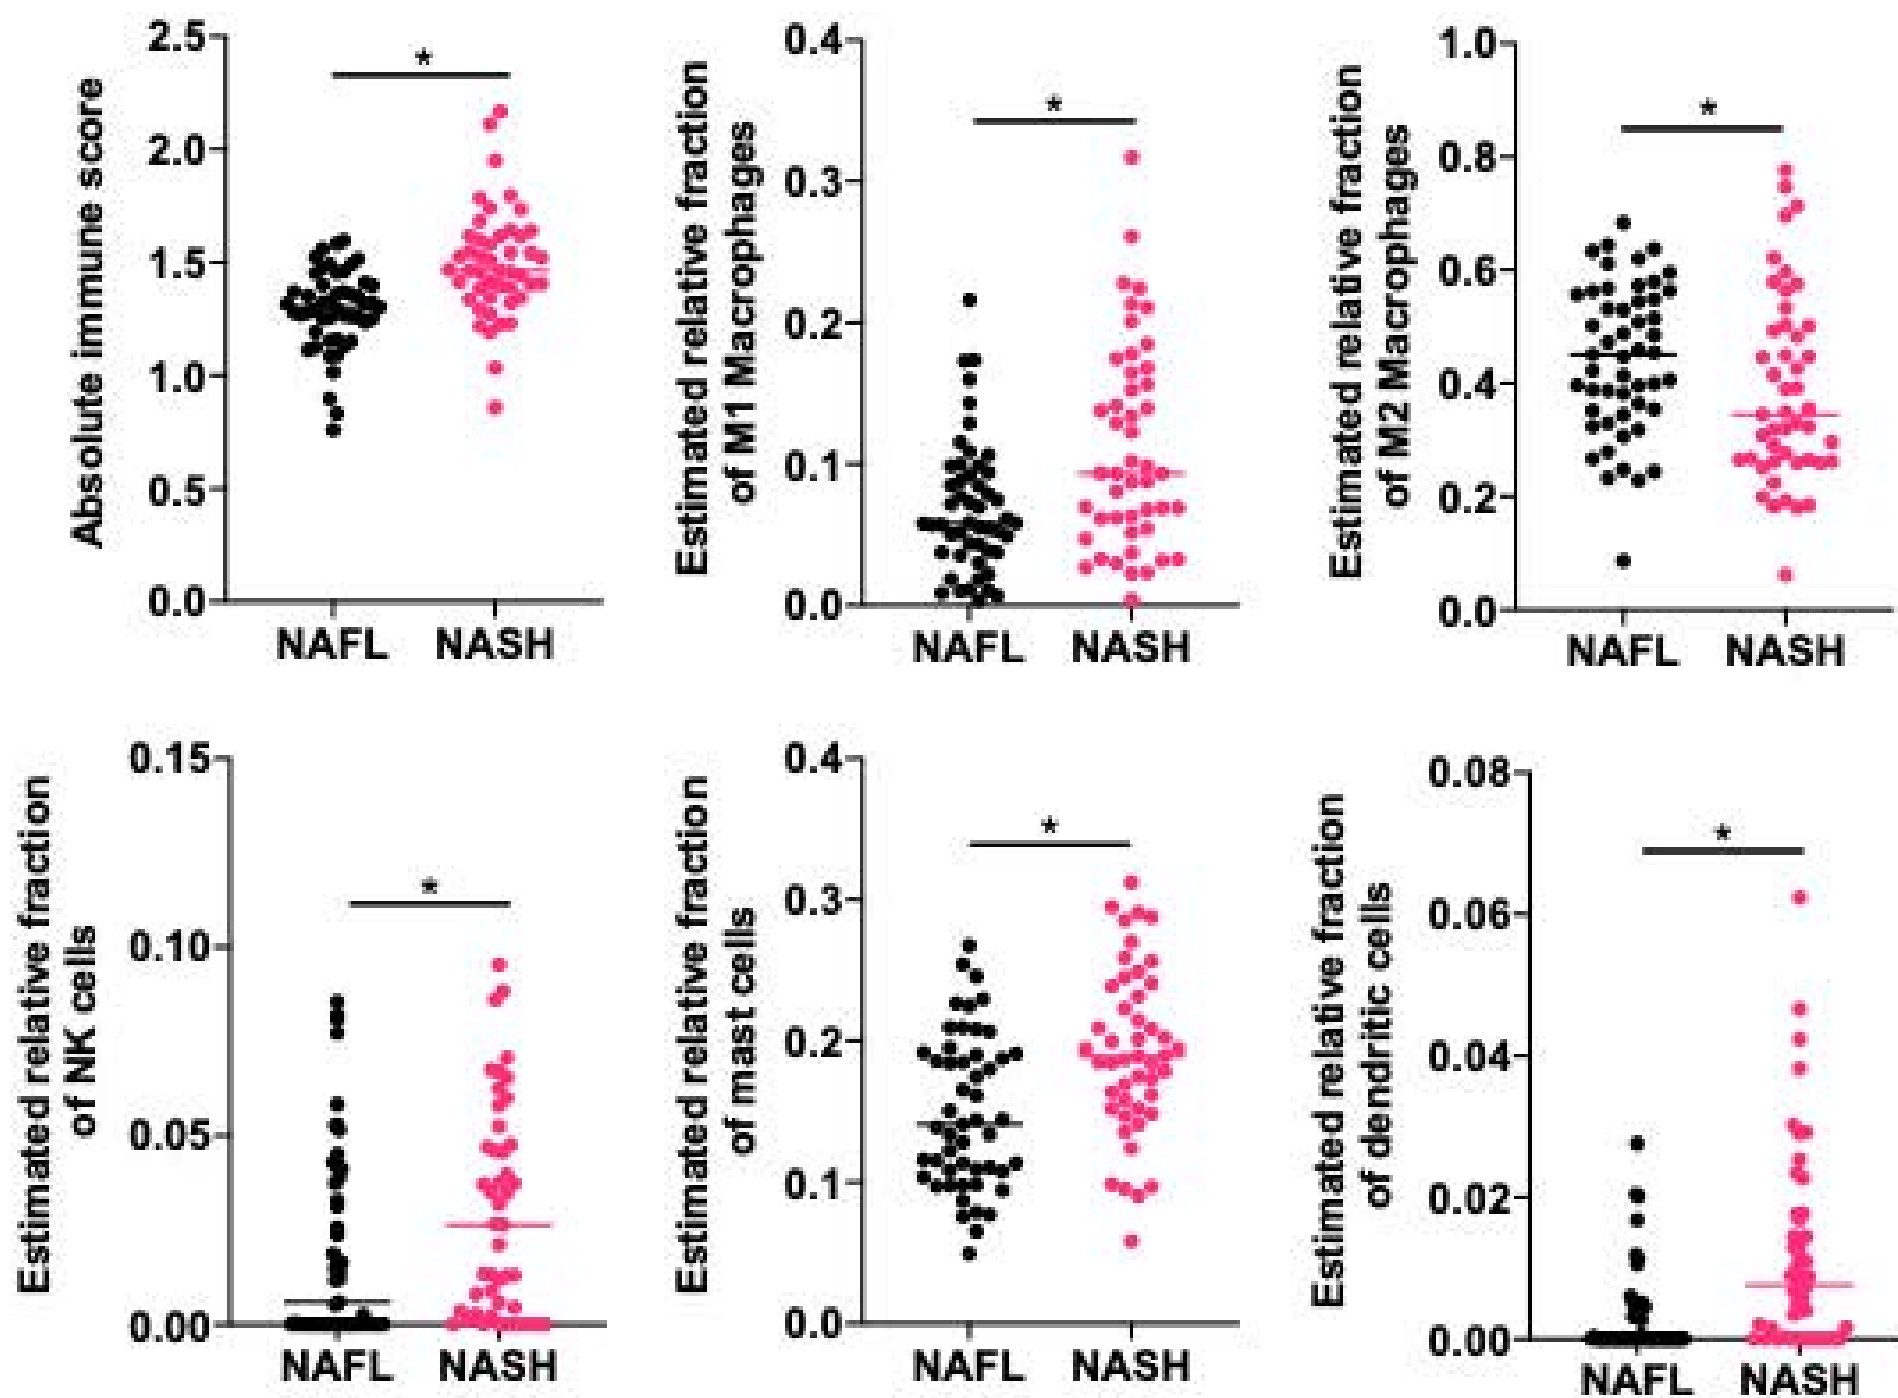

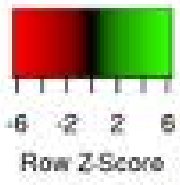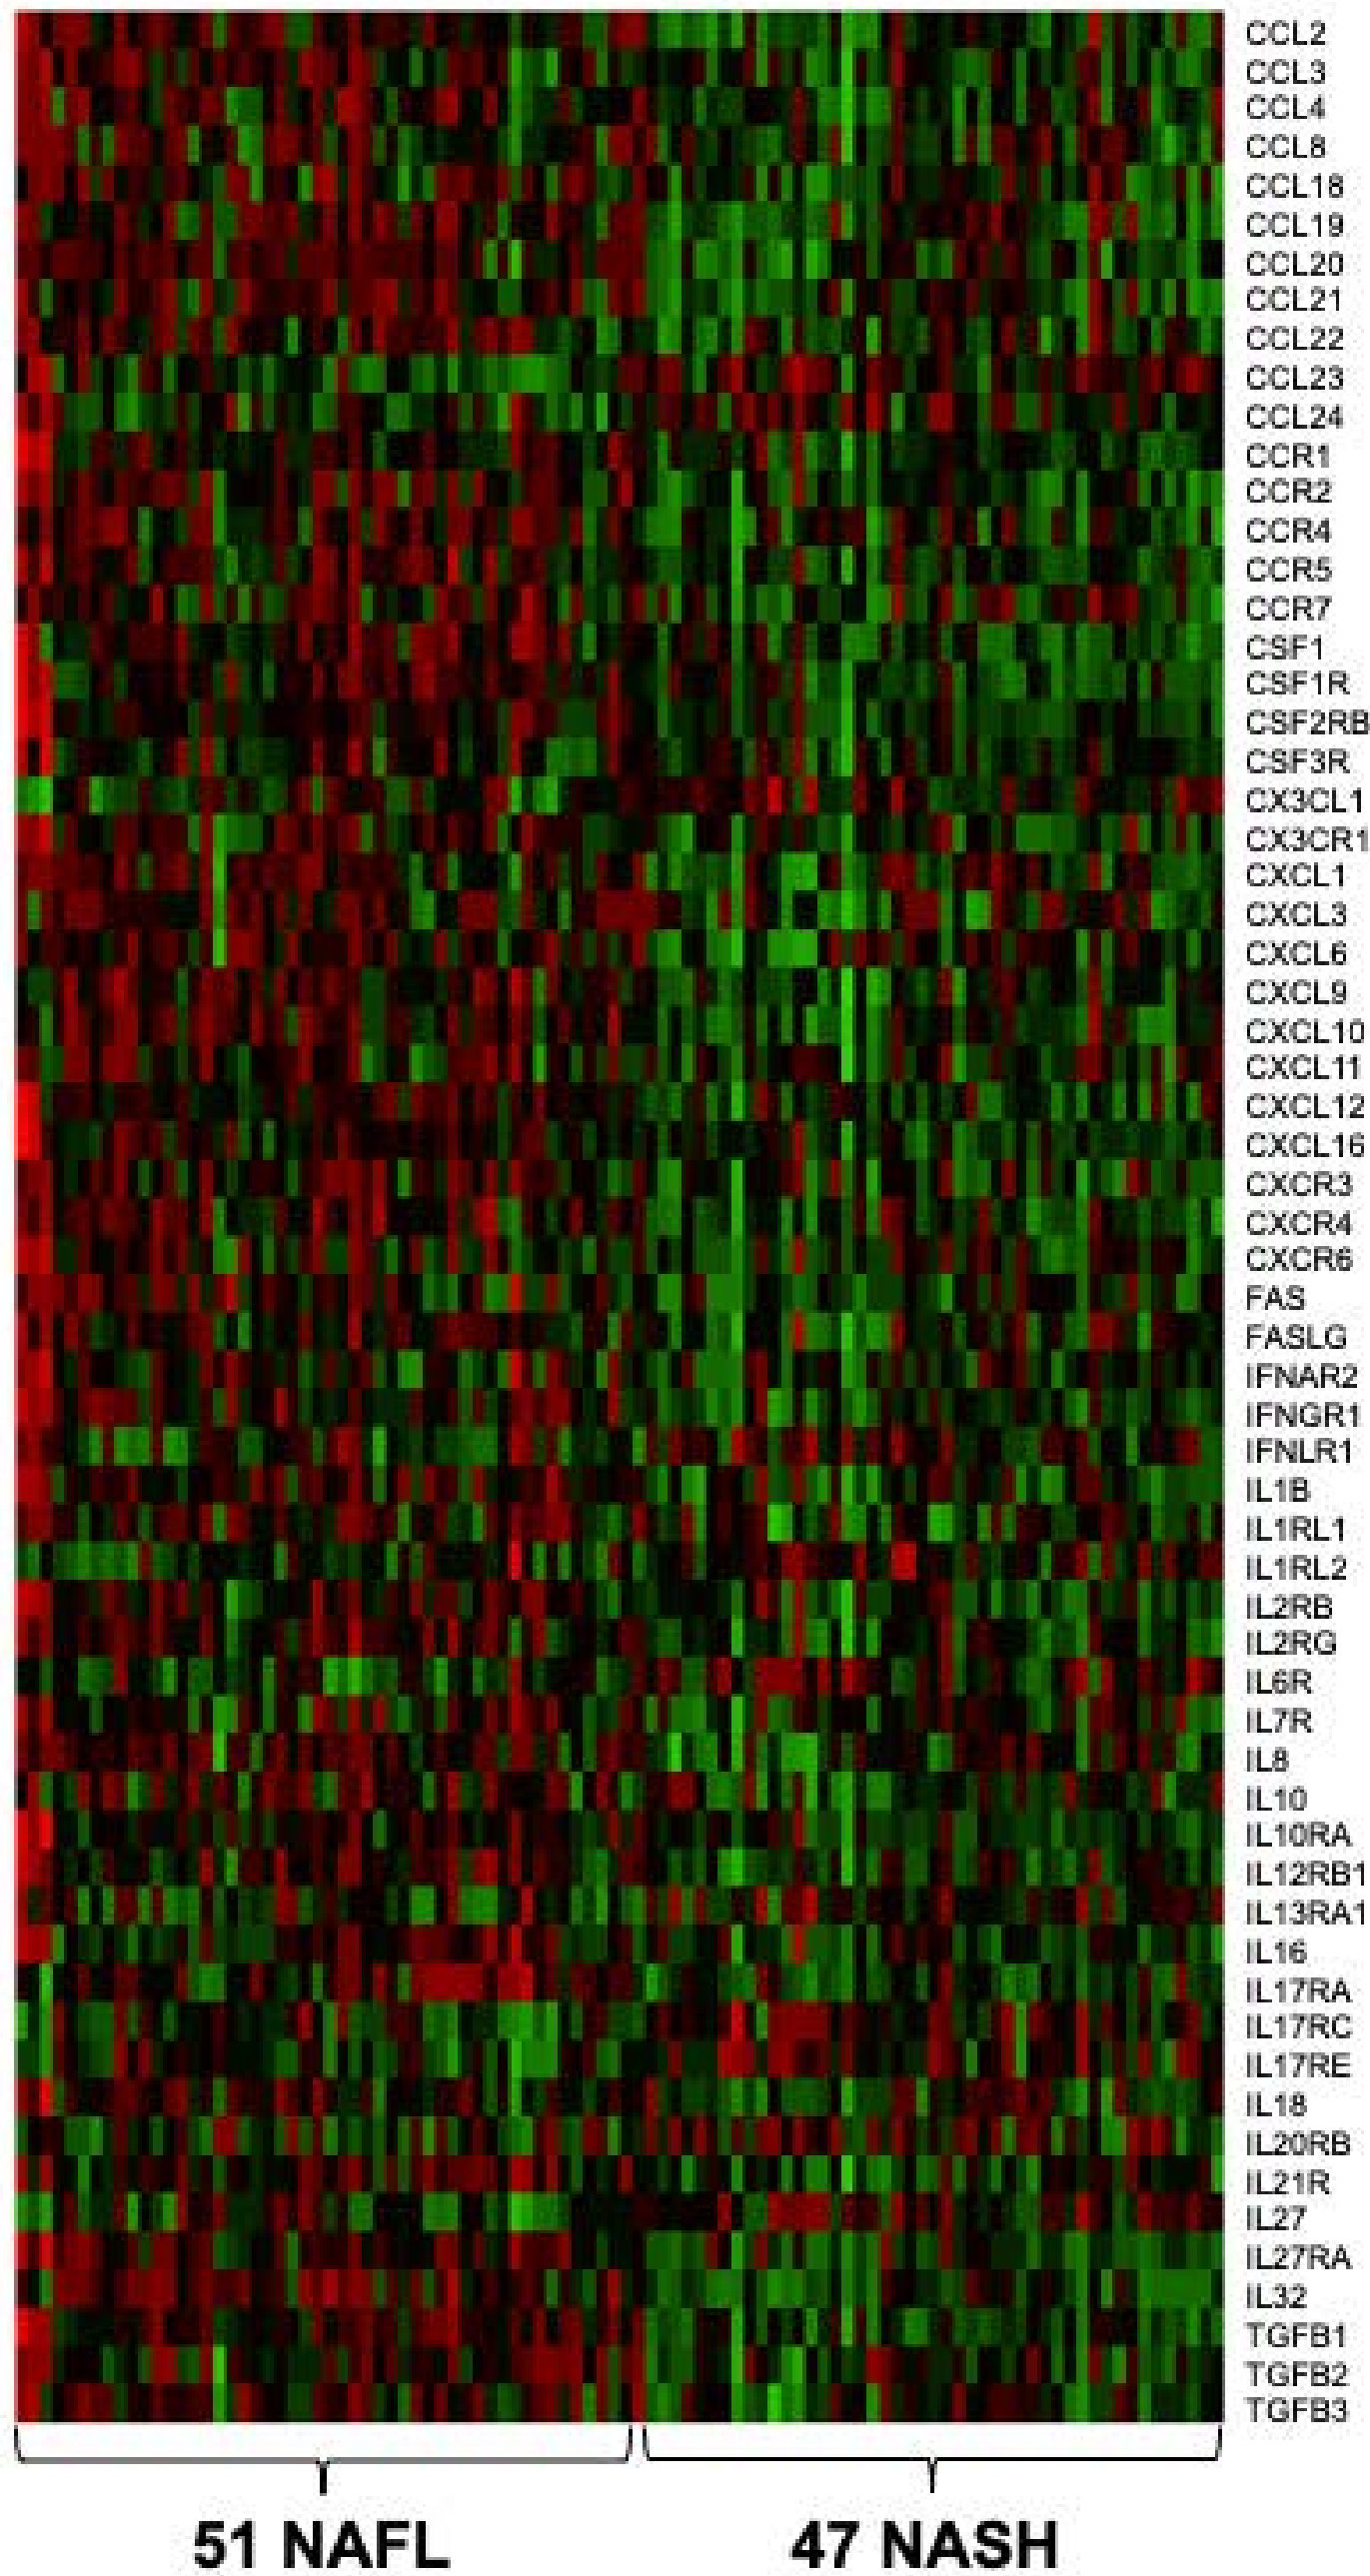

CCL2  
CCL3  
CCL4  
CCL8  
CCL18  
CCL19  
CCL20  
CCL21  
CCL22  
CCL23  
CCL24  
CCR1  
CCR2  
CCR4  
CCR5  
CCR7  
CSF1  
CSF1R  
CSF2RB  
CSF3R  
CX3CL1  
CX3CR1  
CXCL1  
CXCL3  
CXCL6  
CXCL9  
CXCL10  
CXCL11  
CXCL12  
CXCL16  
CXCR3  
CXCR4  
CXCR6  
FAS  
FASLG  
IFNAR2  
IFNGR1  
IFNLR1  
IL1B  
IL1RL1  
IL1RL2  
IL2RB  
IL2RG  
IL6R  
IL7R  
IL8  
IL10  
IL10RA  
IL12RB1  
IL13RA1  
IL16  
IL17RA  
IL17RC  
IL17RE  
IL18  
IL20RB  
IL21R  
IL27  
IL27RA  
IL32  
TGFB1  
TGFB2  
TGFB3

Supplementary Figure 3



**A**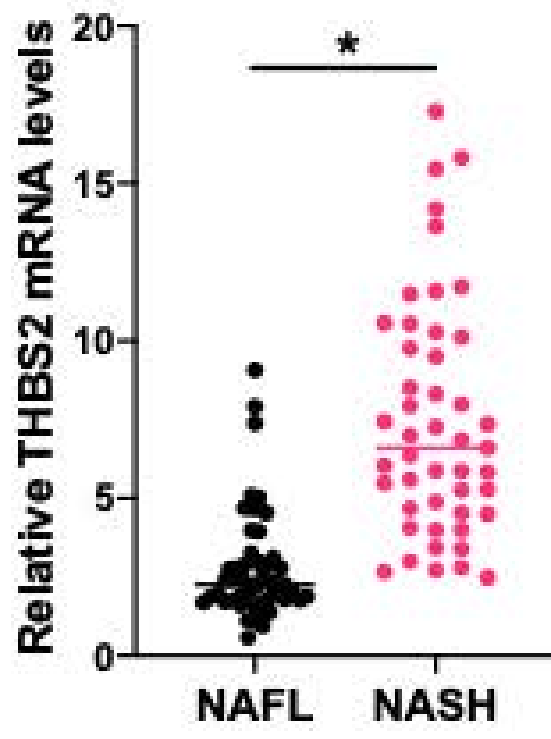**B**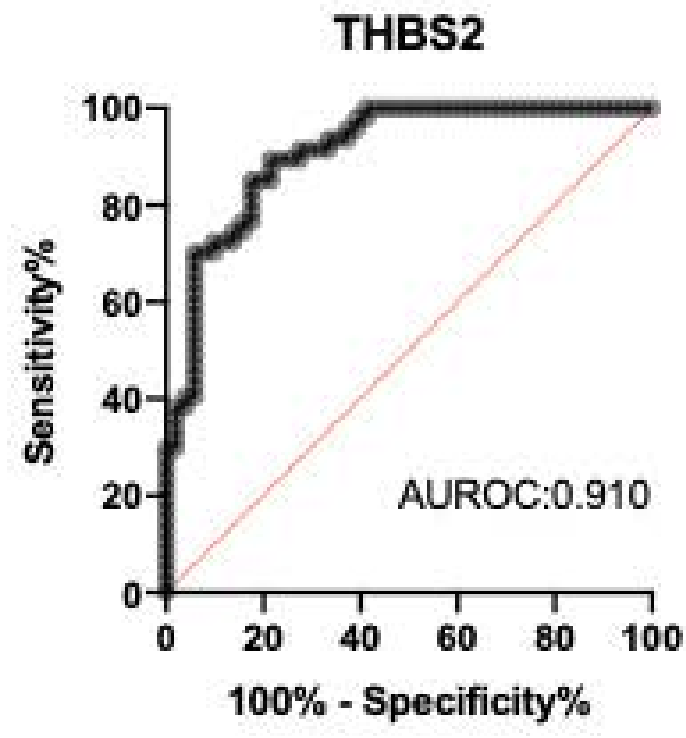**Supplementary Figure 4**

**A**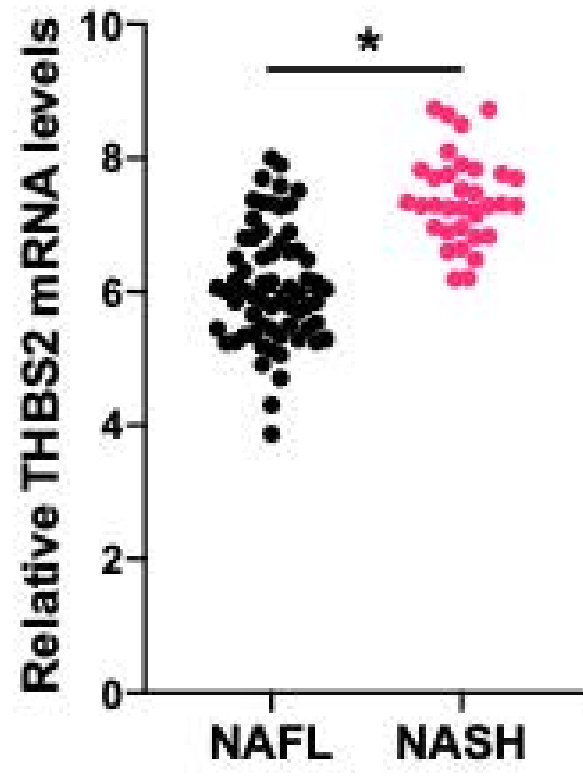**B**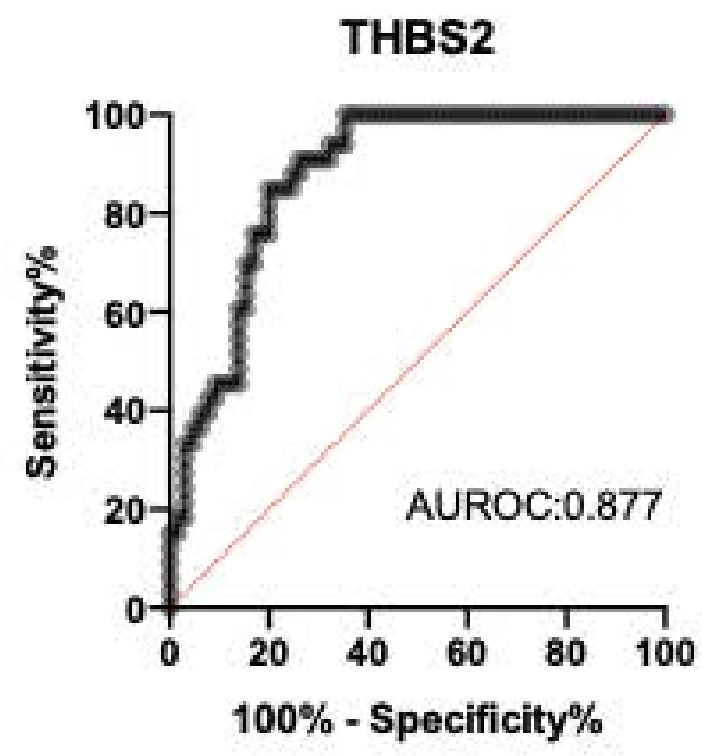**Supplementary Figure 5**

**A**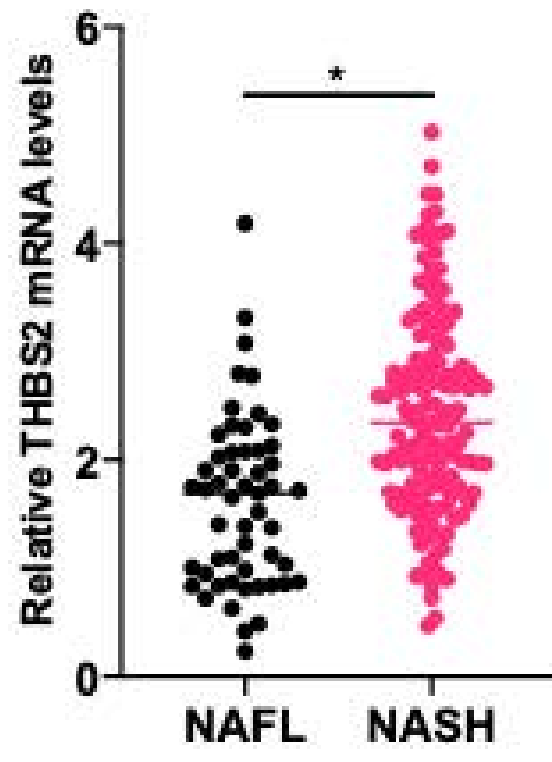**B**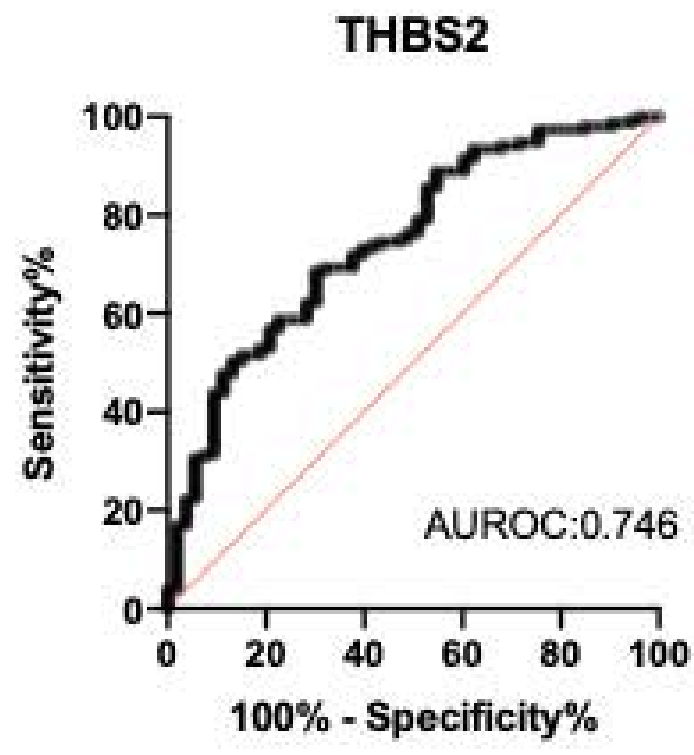**Supplementary Figure 6**

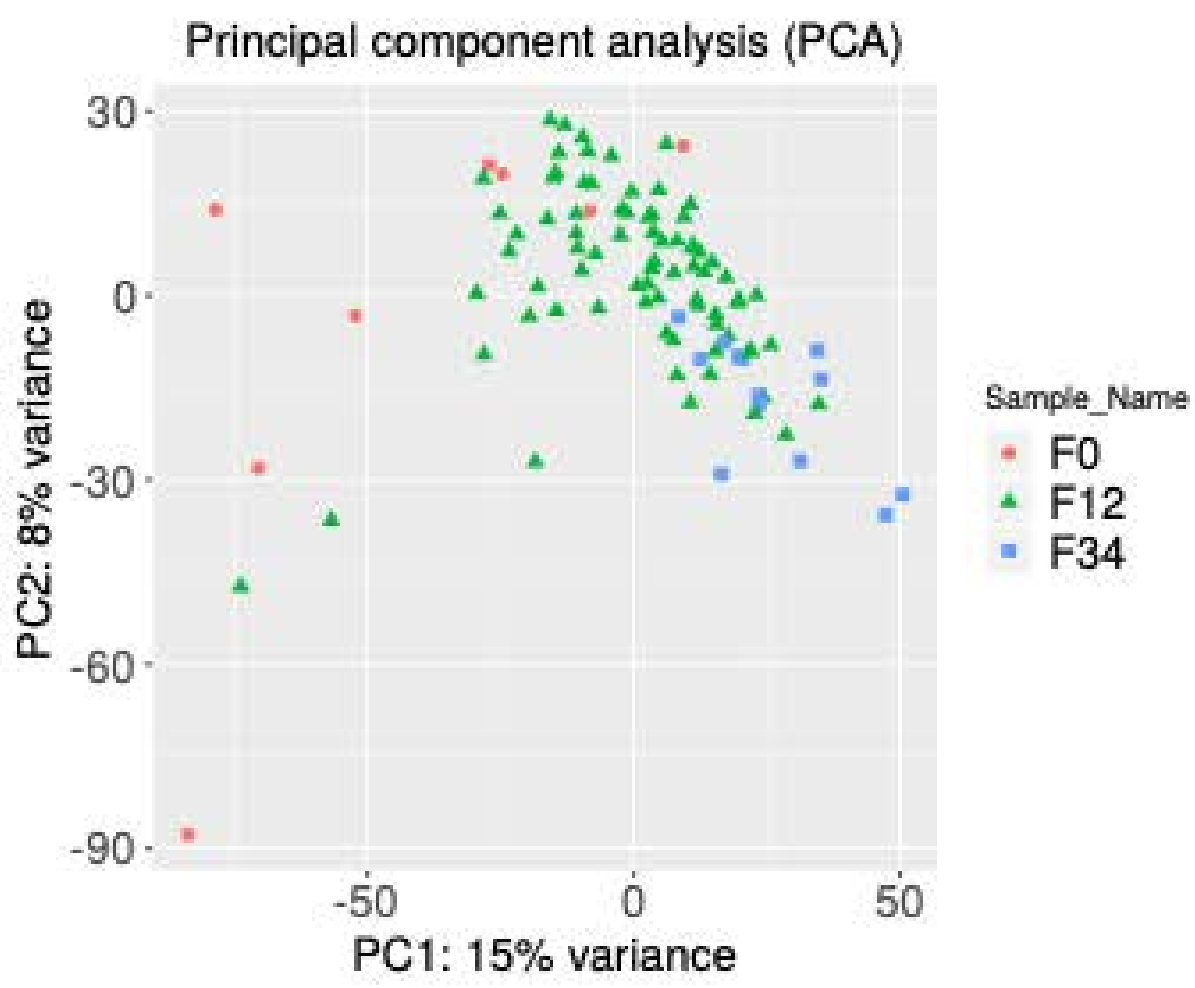

**Supplementary Figure 7**

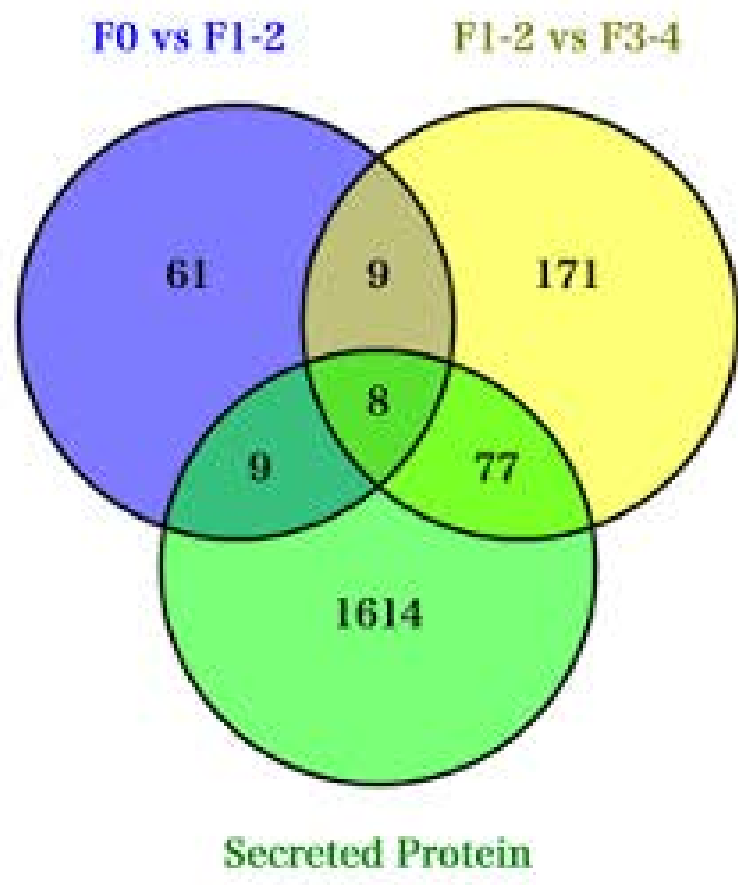

**Supplementary Figure 8**

**A**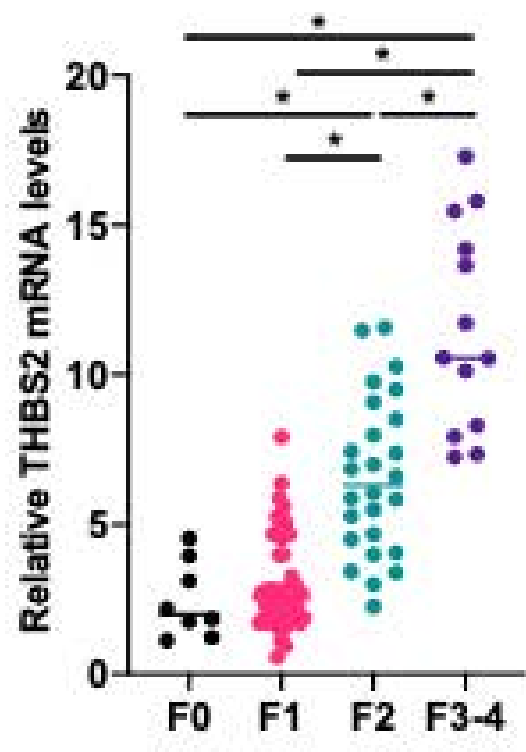**B**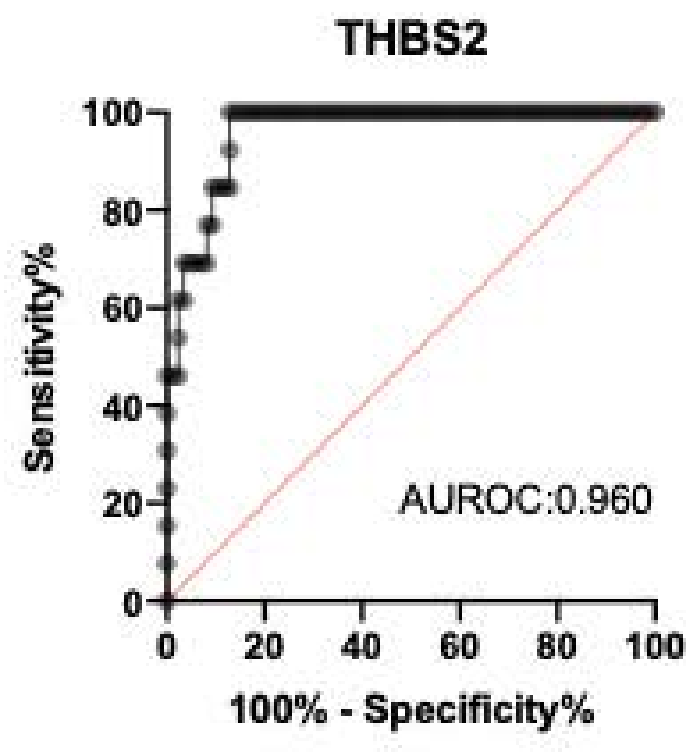**Supplementary Figure 9**

**A**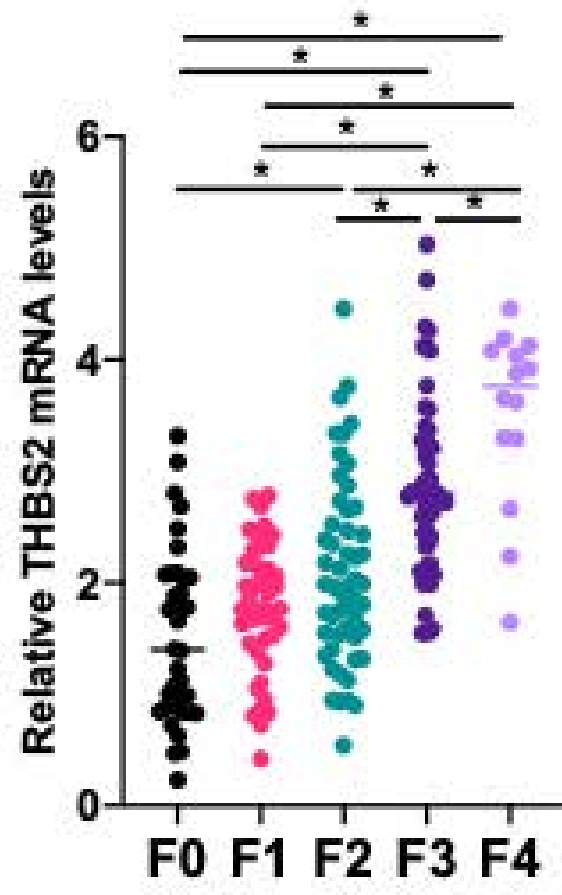**B**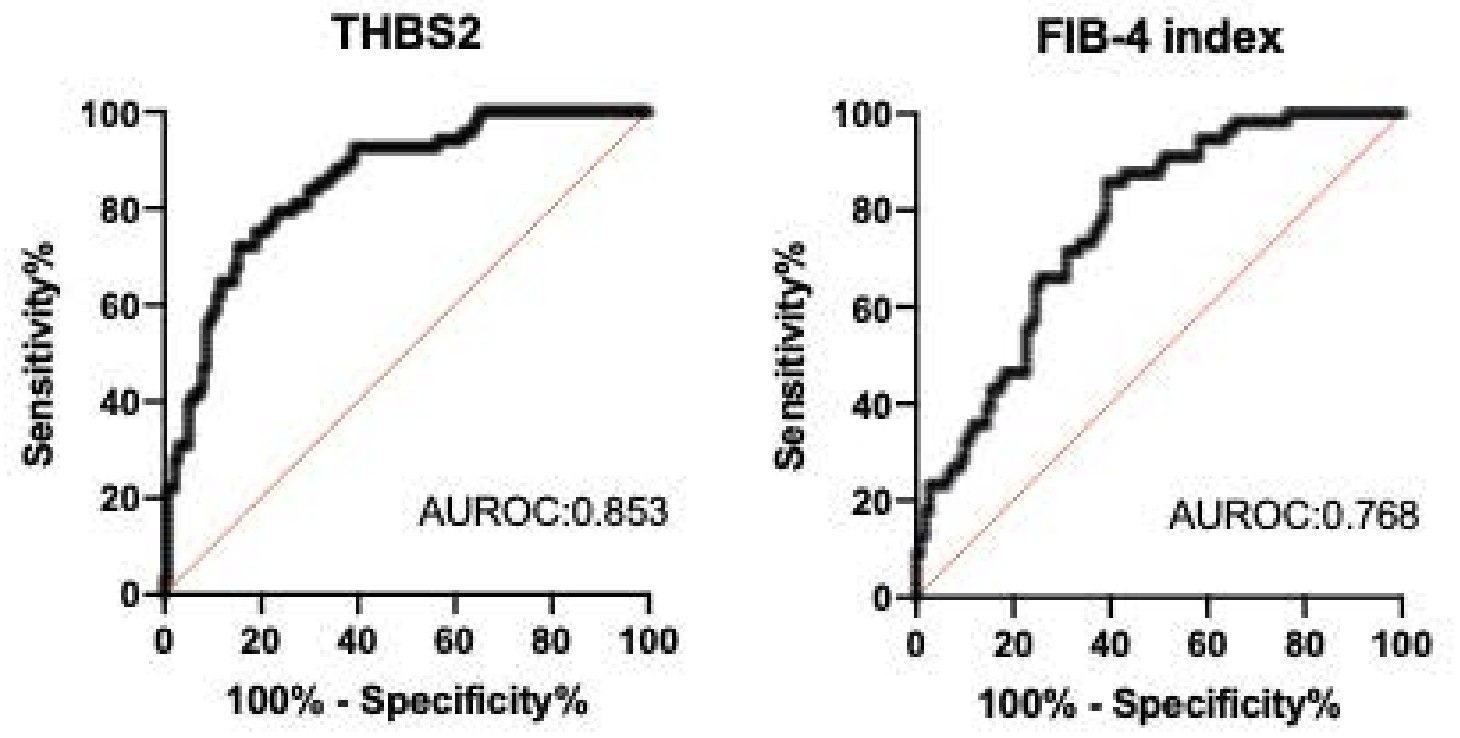**Supplementary Figure 10**

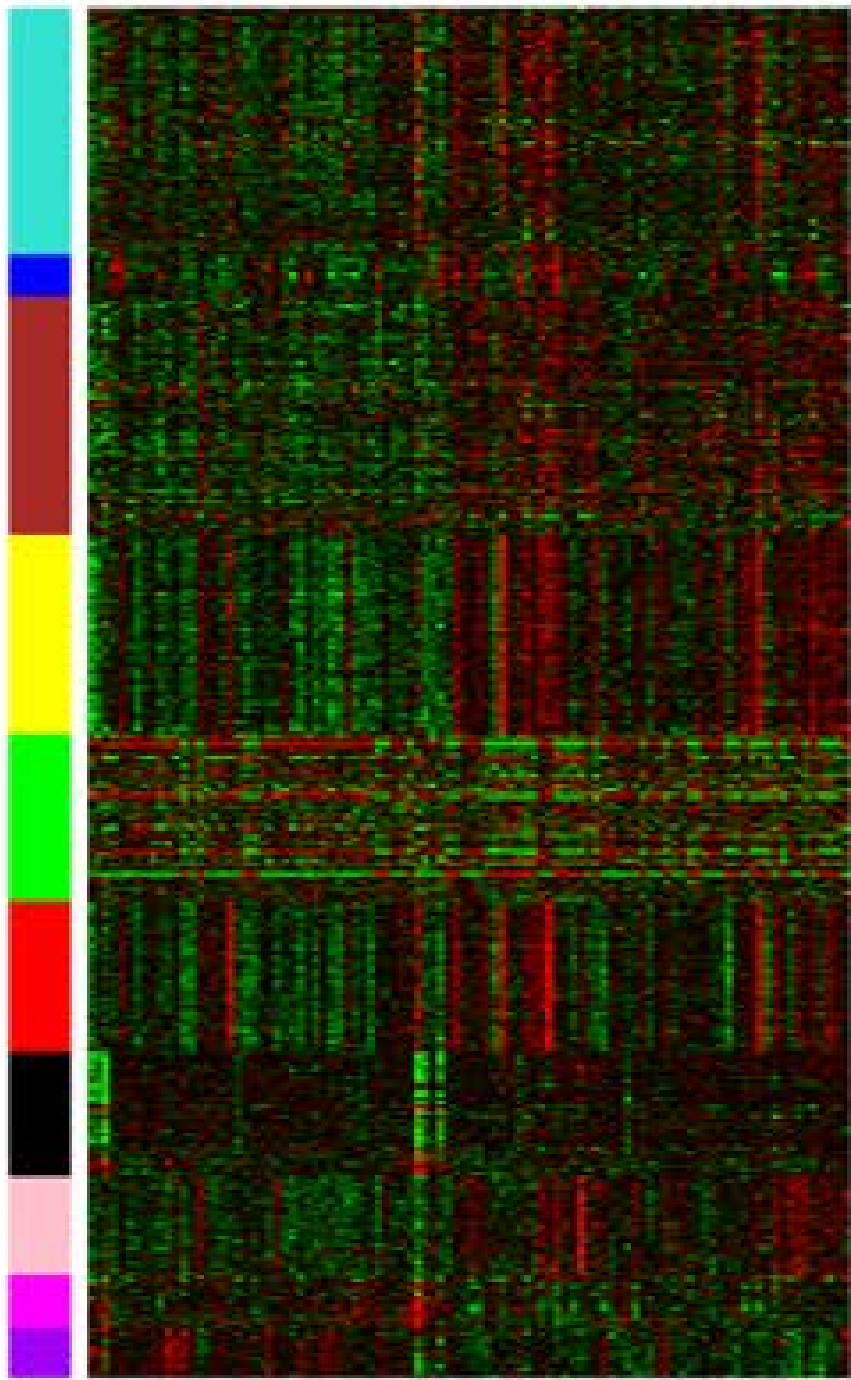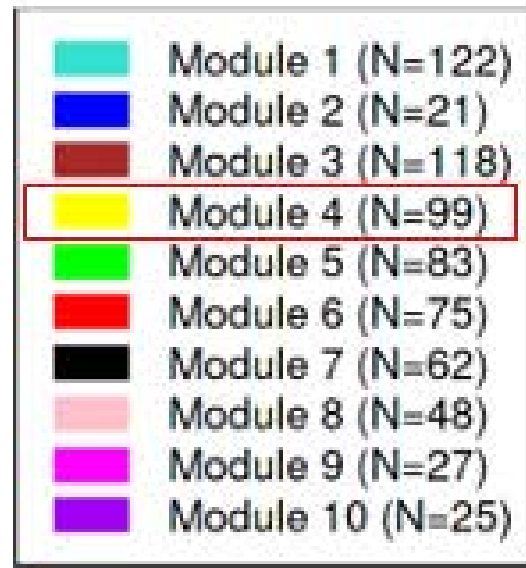

**Supplementary Figure 11**



**A**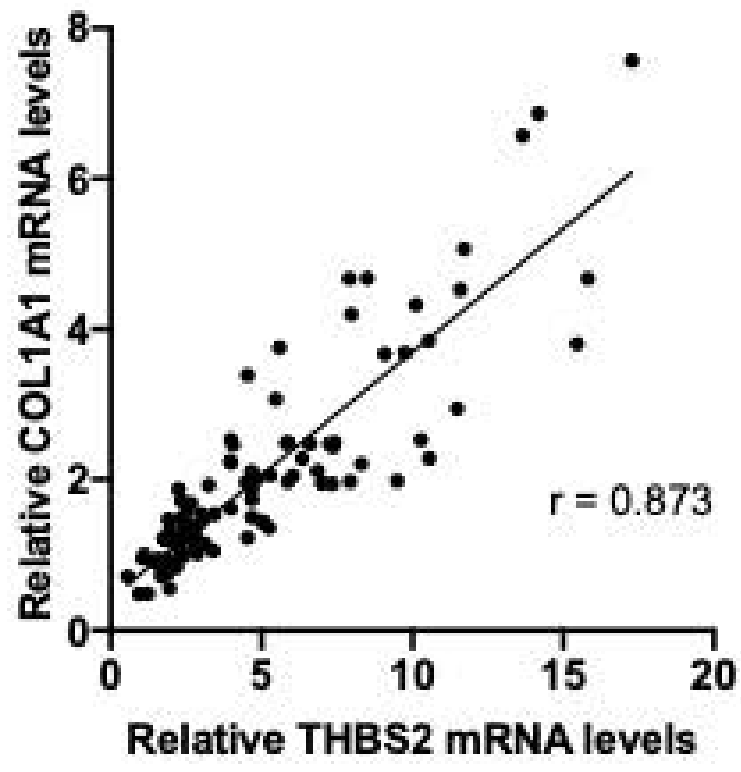**B**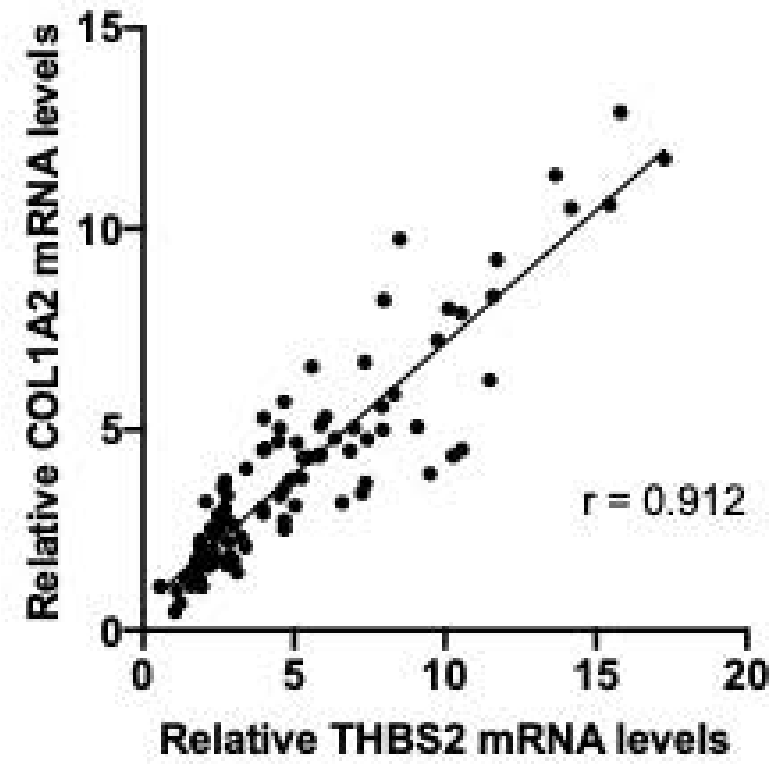**Supplementary Figure 12**

**A**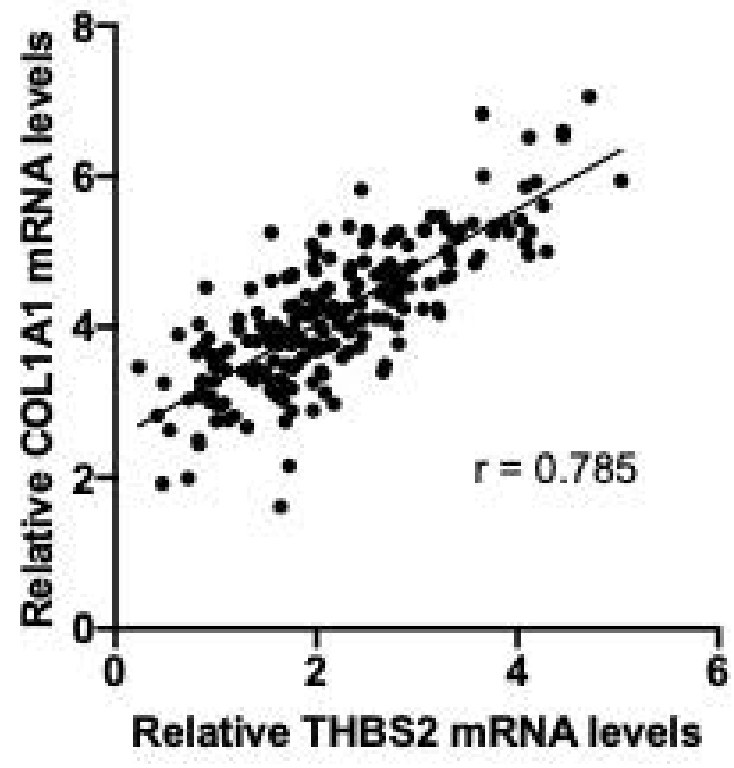**B**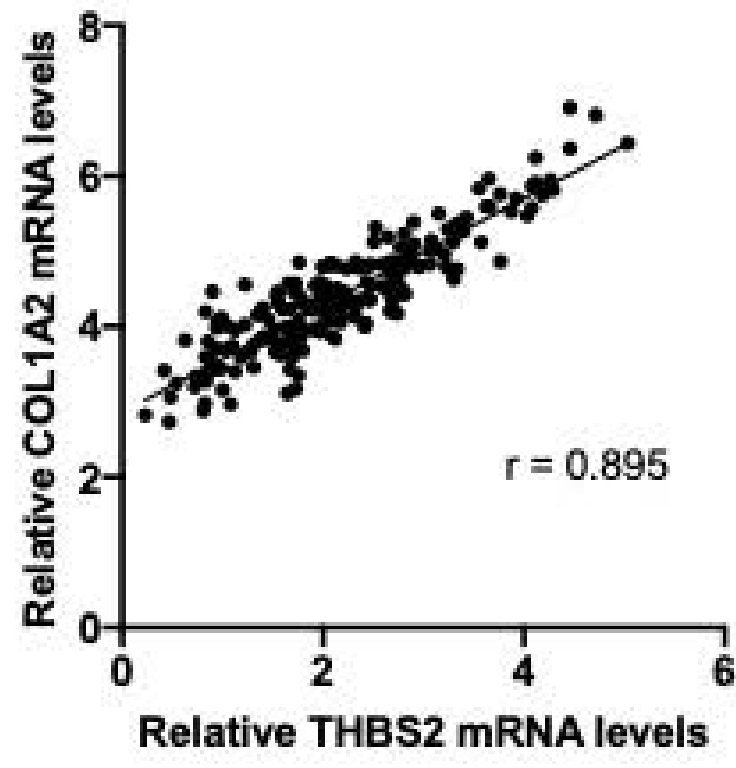**Supplementary Figure 13**

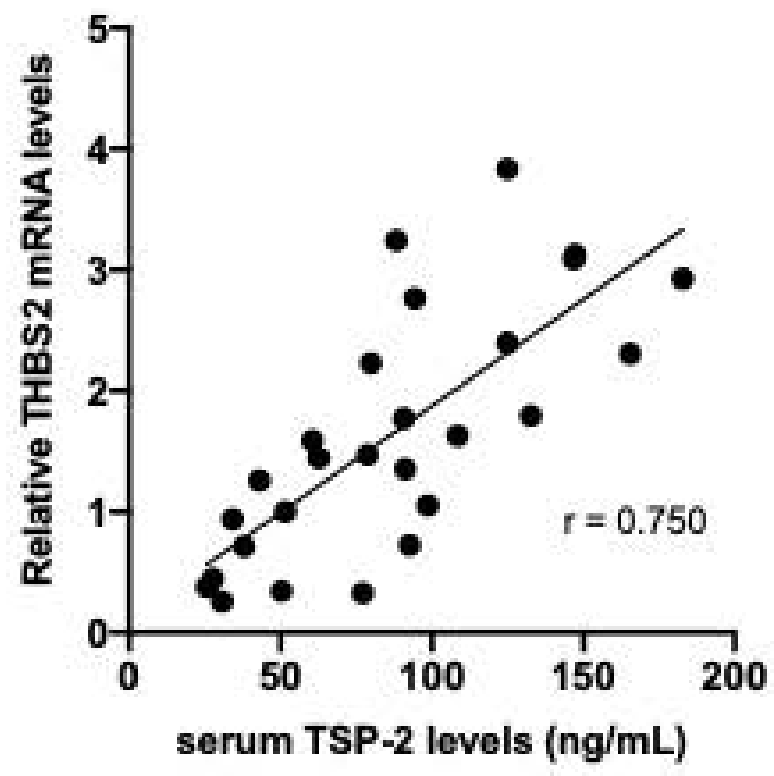

**Supplementary Figure 14**

**A**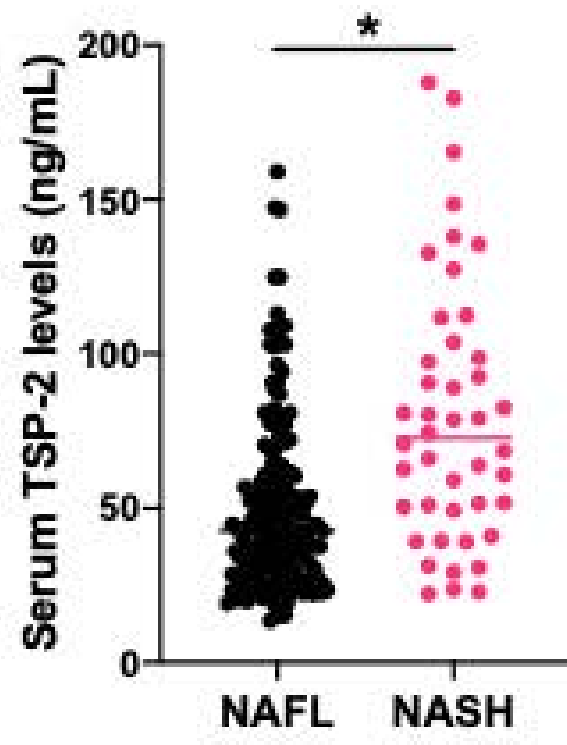**B**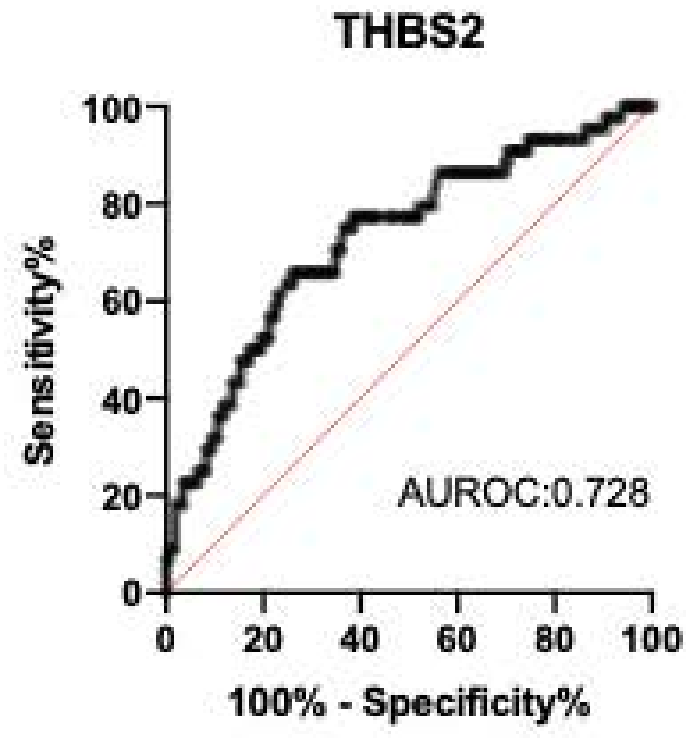**Supplementary Figure 15**

**A**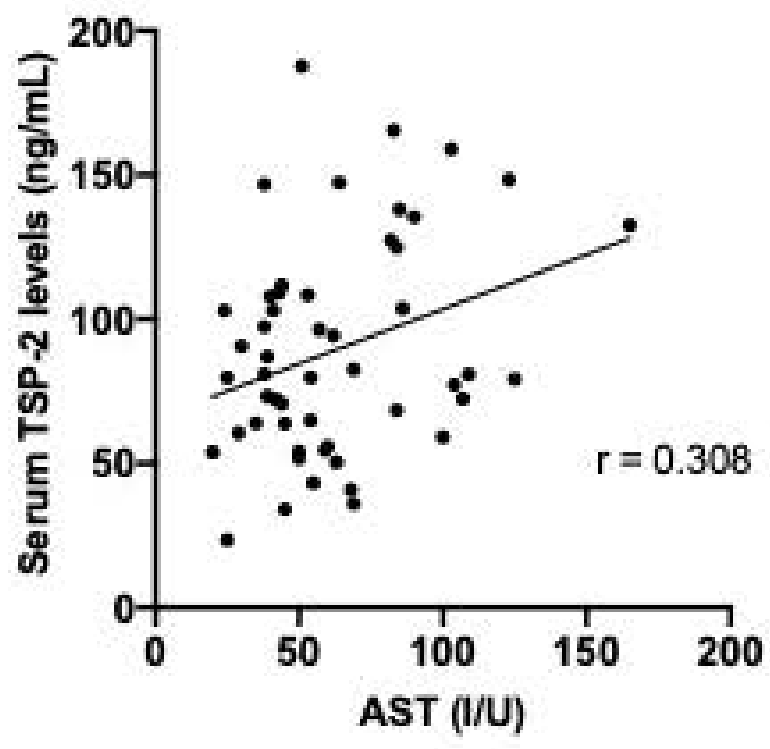**B**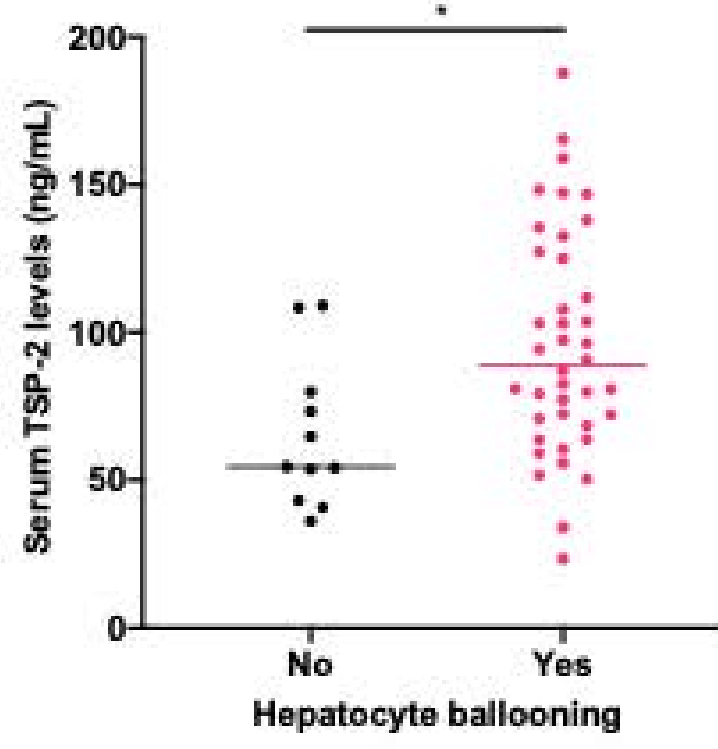**Supplementary Figure16**
